1 *Celecoxib exhibits therapeutic potential in experimental model of*  
2 *hyperlipidaemia*

3

4 Martins Ekor<sup>1\*</sup>, Phyllis E. Owusu Agyei<sup>1</sup>, Ernest Obese<sup>1</sup>, Robert P. Biney<sup>1</sup>, Isaac T.  
5 Henneh<sup>1,2</sup>, Meshack Antwi-Adjei<sup>1</sup>, Ewura S. Yahaya<sup>1</sup>, Gordon Amoakohene<sup>3</sup>, Patrick K.  
6 Akakpo<sup>4</sup>

7

8 <sup>1</sup> Department of Pharmacology, School of Medical Sciences, University of Cape Coast,  
9 Cape Coast, Ghana

10 <sup>2</sup> School of Pharmacy and Pharmaceutical Sciences, University of Cape Coast, Cape  
11 Coast, Ghana.

12 <sup>3</sup> Department of Biomedical Sciences, School of Allied Health Sciences, University of  
13 Cape Coast, Cape Coast, Ghana

14 <sup>4</sup> Department of Pathology, School of Medical Sciences, University of Cape Coast, Cape  
15 Coast, Ghana.

16

17 \*Corresponding Author:

18 Email: [martins.ekor@ucc.edu.gh](mailto:martins.ekor@ucc.edu.gh) and [m\\_ekor@yahoo.com](mailto:m_ekor@yahoo.com) (ME)

19

20

## 21 **Abstract**

22 Hyperlipidaemia is a major risk factor for cardiovascular diseases, the leading cause  
23 of death globally. Celecoxib attenuated hypercholesterolemia associated with CCl<sub>4</sub>-  
24 induced hepatic injury in rats without improving liver function in our previous  
25 study. This present study investigated the lipid lowering potential of celecoxib in  
26 normal rats fed with coconut oil subjected to five deep-frying episodes. Male  
27 Sprague Dawley rats were randomly assigned to groups (n=6 rats/group) which  
28 received physiological saline (10 mL/kg), unheated coconut oil (UO, 10 mL/kg) or  
29 heated coconut oil (HO, 10 ml/kg) for 60 days. Groups that received HO were  
30 subsequently treated with either physiological saline, atorvastatin (25 mg/kg),  
31 celecoxib (5 mg/kg) or celecoxib (10 mg/kg) in the last fifteen days of the  
32 experiment. Rats were sacrificed 24 hours after last treatment and blood and tissue  
33 samples collected for analysis. HO consumption produced significant  
34 hyperlipidaemia and elevation in marker enzymes of hepatic function. Celecoxib  
35 ameliorated the hyperlipidaemia as shown by the significantly (P<0.05) lower total  
36 cholesterol, triglycerides, low and very low density lipoprotein in the celecoxib-  
37 treated rats when compared with HO-fed rats that received saline. Celecoxib also  
38 reduced (P<0.05) alanine aminotransferase, aspartate aminotransferase, alkaline  
39 phosphatase and liver weight of hyperlipidaemic rats. Similarly, hepatocellular  
40 damage and inflammation of the aorta associated with the hyperlipidaemia was  
41 significantly reversed by celecoxib. However, serum TNF- $\alpha$  and IL-6 did not  
42 change significantly between the various groups. Taken together, data from this  
43 study suggest that celecoxib may exert therapeutic benefit in hyperlipidaemia and  
44 its attendant consequences.

45 Keywords: hyperlipidaemia, cardiovascular health, liver function, coconut oil,

46 celecoxib

47

48

49

50

51

52

53

54

55

56

57

58

59

60

61

62

63

64

65

66

67

68

## 69 **Introduction**

70 Hyperlipidaemia, also recognised as dyslipidaemia, describes the manifestation of  
71 different disorders of lipoprotein metabolism [1]. Patients with hyperlipidaemia are  
72 mostly asymptomatic but have an increased risk for cardiovascular diseases (CVDs).  
73 CVDs are recognized as one of the leading causes of mortality and a major cause of  
74 morbidity worldwide [2-6]. Atherosclerosis, a vascular disease affecting blood circulation  
75 in the coronary, central, and peripheral arteries, is the major form of CVD and it is  
76 characterized by chronic inflammatory build up, driven largely by lipid accumulation  
77 within the walls of the artery. Unlike acute inflammation, atherosclerosis is hallmarked  
78 by a state of unresolved low-grade chronic inflammation. Importantly, low-grade  
79 inflammation is also a feature of several diseases known to increase the risk of CVD [3].  
80 Besides hypertension, chronic dyslipidaemia is a major cause of atherosclerosis [7].  
81 Although elevated low density lipoprotein cholesterol (LDL-C) is thought to be the best  
82 indicator of atherosclerosis risk, dyslipidaemia can also describe elevated total cholesterol  
83 (TC) or triglycerides (TG), or low levels of high density lipoprotein cholesterol (HDL-C)  
84 [8].

85 Hyperlipidaemia may affect the severity of tissue damage in other pathological  
86 conditions, notably in liver injury [9]. Primary associated clinical findings of fatty liver  
87 are hyperlipidaemia, hyperglycaemia, hypertension, and hyperuricemia [10]. Although,  
88 some success has been achieved with the use of statins in the management of  
89 hyperlipidaemia, with reports of improved quality of life and decreased mortality and  
90 morbidity in many patients with CVDs [11], the use of statins has been associated with  
91 side effects such as myopathy, headache, bowel upset, nausea, sleep disturbance,  
92 increased creatinine phosphokinase and serum transaminase hence requiring routine

93 monitoring of these parameters [12]. Fibrates, bile acid sequestrants and nicotinic acid  
94 which constitute other modalities of treatment have some side effects as well [12]. This  
95 notwithstanding, their control of lipid levels is far from satisfactory. This calls for  
96 increased search for newer drugs with hypolipidaemic properties or repurposing of  
97 existing drugs for use in hyperlipidaemic conditions.

98 The non-steroidal anti-inflammatory drugs (NSAIDs) are used primarily for the  
99 management of inflammatory conditions such as arthritis and are known to exert their  
100 effect via inhibition of cyclooxygenase (COX-1 and COX-2) activity [13]. At higher  
101 concentrations, NSAIDs are also known to reduce production of superoxide radicals,  
102 induce apoptosis, impede the expression of adhesion molecules, decrease nitric oxide  
103 synthase, decrease proinflammatory cytokines (*e.g.*, TNF- $\alpha$ , interleukin-1), modify  
104 lymphocyte activity and alter cellular membrane functions [14]. All these markers are  
105 known to be up-regulated in inflammatory conditions and other disorders which have  
106 inflammatory subsidiaries. NSAIDs such as ibuprofen have been shown to lower plasma  
107 cholesterol levels and reduce the progression of atherosclerosis in humans and laboratory  
108 animals [15-17]. Other studies have shown that indomethacin lowers the cholesterol  
109 content in liver and atherosclerotic blood vessels [18, 19]. Most of these effects of  
110 NSAIDs have been observed in *in vitro* cell cultures, or with atherogenic diets in rabbits  
111 [13].

112 The Coxibs, designed to selectively block COX-2, appeared a promising solution in the  
113 effort to avoid the gastrointestinal and other adverse effects that were noted with  
114 traditional NSAIDs [20, 21]. Celecoxib was the first specific COX-2 inhibitor to be  
115 approved for the treatment of rheumatic diseases. Observations from several clinical  
116 studies have led to concerns being raised about the cardiovascular safety of the COX-2  
117 inhibitors. While the evidence regarding the cardiovascular risk associated with these

118 drugs was not encouraging, a number of studies demonstrated that celecoxib is safer than  
119 other coxibs. Several preclinical and clinical studies have shown that celecoxib is capable  
120 of exerting a beneficial impact on cardiovascular health [22-25].

121 There has been a general assumption that COX-2 inhibitors may be beneficial in  
122 atherosclerosis, liver disease and hypercholesterolaemia since pathogenesis of these  
123 diseases is closely linked with prostaglandins [15] and since upregulation of COX-2  
124 expression has also been demonstrated in hyperlipidaemia [26]. In our previous study,  
125 celecoxib was observed to significantly attenuate hypercholesterolemia and lipid  
126 peroxidation associated with liver injury during carbon-tetrachloride-associated  
127 hepatotoxicity in rats [27]. This important observation needs further evaluation in  
128 experimental hyperlipidaemia models devoid of hepatotoxin to ascertain the possible  
129 therapeutic potential of celecoxib in hyperlipidaemia. Considering the huge cost, time,  
130 safety and legal challenges associated with discovery of newer drugs, repurposing of  
131 already existing drugs in clinical use for newer indications provides rapid alternative to  
132 ensure improved access to medicines with relatively minimal resources. It is on this basis  
133 that we evaluate the FDA-approved selective COX-2 inhibitor, celecoxib, as a potential  
134 addition to the already existing pharmacotherapy for hyperlipidaemia in the current study.

## 135 **Materials and methods**

### 136 **Animals**

137 Male Sprague-Dawley rats (170-250 g) were obtained from the Noguchi Memorial  
138 Institute for Medical Research, Ghana. The animals were housed in stainless cages (34 ×  
139 47 × 18) in groups of five at the animal house facility of School of Biological Sciences,  
140 University of Cape Coast. Animals were fed with normal commercial diet bought from

141 Flour Mills of Ghana Limited, Tema, Ghana and water was provided *ad libitum*. They  
142 were kept under normal laboratory conditions with regards to room temperature and  
143 humidity. All the techniques and protocols used in the study were done in accordance  
144 with established public health guidelines in “Guide for Care and Use of Laboratory  
145 Animals” [28] (Garber *et al.* 2011).

## 146 **Drugs and chemicals**

147 Celecoxib (Celebrex<sup>TM</sup>) and Atorvastatin (Lipitor<sup>®</sup>) were purchased from Pfizer  
148 Pharmaceutical LLC, Vega Baja, Puerto Rico Virgin<sup>®</sup> coconut oil was purchased from  
149 the Kotokuraba market at Cape Coast, Ghana.

## 150 **Experimental design and treatment**

151 Thirty-six rats (weighing between 170–250 g) were divided into six groups of 6 rats per  
152 group and fed with normal commercial diet during the 7-day acclimatization period and  
153 throughout the 60-day experimental period. Animals were treated as follows as shown in  
154 the Table 1. The doses of atorvastatin (ATO) and celecoxib (CXB) were selected  
155 according to previous studies [27]. Animals were fasted overnight after all the treatments  
156 and fasting blood glucose levels were measured 24 h after the final treatment. The animals  
157 were humanely sacrificed by cervical dislocation and blood and organs were harvested  
158 for other investigations. Blood samples were collected via cardiac puncture into EDTA  
159 and gel separator tubes for haematological and biochemical analyses, respectively.

160

161

162

163

164 **Table 1: Treatment schedule**

|                                                                             | <b>Group 1</b> | <b>Group 2</b> | <b>Group 3</b> | <b>Group 4</b>  | <b>Group 5</b> | <b>Group 6</b>  |
|-----------------------------------------------------------------------------|----------------|----------------|----------------|-----------------|----------------|-----------------|
| <b>Treatment for 60 Days</b>                                                | NS 10<br>mL/kg | UO 10<br>mL/kg | HO 5<br>mL/kg  | HO 5<br>mL/kg   | HO 5<br>mL/kg  | HO 5<br>mL/kg   |
| <b>Additional Treatment<br/>from 46<sup>th</sup> to 60<sup>th</sup> Day</b> | NS 10<br>mL/kg | NS 10<br>mL/kg | NS 10<br>mL/kg | ATO 25<br>mg/kg | CXB 5<br>mg/kg | CXB 10<br>mg/kg |

165 NS=normal saline, UO=unheated oil, HO=Heated coconut oil, ATO=atorvastatin and  
166 CXB=celecoxib  
167

168 **Relative weight of organs**

169 Specific organs, including the liver, heart, kidney, lungs and spleen were harvested and  
170 weighed. Relative organ weights (mg/kg body weight) were estimated and values  
171 analyzed.

172 **Haematological analysis**

173 Blood samples were analyzed by haem automated analyzer (CELL-DYN 1700, Abbot  
174 Diagnostics Division, Abbot Laboratories, Abbot Park, Illinois, USA) for total blood  
175 count and specific differentials.

176 **Biochemical analysis**

177 Blood samples were allowed to clot for 30 min at room temperature and centrifuged at  
178 1000 rpm for 10 min. Serum obtained was stored at -20°C until biochemical analysis was  
179 carried out. Serum indices were analyzed by an automated analyzer (ATAC 8000  
180 Random Access Chemistry System, Elan Diagnostics, Smithfield, RI, USA) and



181 estimations for aspartate aminotransferase (AST), alanine aminotransferase (ALT),  
182 alkaline phosphatase (ALP), Creatinine, blood urea nitrogen (BUN), fasting blood sugar  
183 (FBS), total cholesterol (TC), triglycerides (TG), high density lipoprotein (HDL)  
184 cholesterol direct, low-density lipoprotein (LDL) cholesterol and very low-density  
185 lipoprotein (VLDL) were recorded

### 186 **Serum Cytokine (IL-6 and TNF- $\alpha$ ) levels**

187 The blood samples were centrifuged at 1000 rpm for 10 min. Sera formed were aliquoted  
188 into eppendorf tubes and stored at -20°C before analysis. Serum levels of IL-6 and TNF-  
189  $\alpha$  were estimated in duplicates with specific rat ELISA kit (Boster Biological Technology  
190 3942 Valley Ave Pleasanton, CA 94566, USA) assay in accordance with the  
191 recommendations of the manufacturer. The absorbance of the samples was read at 450  
192 nm using a micro-plate spectrometer (Spectramax 190 Micro-plate Spectrometer, 90-  
193 250V 50-60Hz, Molecular Devices, CA, USA).

### 194 **Histopathological studies**

195 Portions of the tissues from liver, kidney, heart, lungs, spleen and aorta were used for  
196 histopathological examination. Tissues were fixed in 10% neutral buffered formalin (pH  
197 7.2) and dehydrated through a series of ethanol solutions, embedded in paraffin and  
198 routinely processed for histological analysis. A section (2  $\mu$ m thickness) was cut and  
199 stained with haematoxylin-eosin for examination. The stained tissues were observed  
200 through an Olympus BX-51 microscope (Olympus Corporation, Tokyo, Japan) and  
201 photographed by INFINITY 4 USB Scientific Camera (Lumenera Corporation, Ottawa,  
202 Canada).

203

## 204 **Data analysis**

205 Data has been presented as mean of six rats  $\pm$  standard error of mean (SEM). The presence  
206 of significant differences between means of groups was determined by one-way analysis  
207 of variance (ANOVA) using GraphPad Prism for Windows version 7 (GraphPad  
208 Software, San Diego, CA, USA). Significant difference between groups was determined  
209 using the Newman-Keuls' Multiple Comparison Test with  $P < 0.05$  considered statically  
210 significant.

## 211 **Results**

### 212 **Changes in relative organ weights**

213 The results presented in Fig 1 describe the effect of celecoxib (CXB 5 and 10 mg/kg) and  
214 atorvastatin (ATO 25 mg/kg) on hyperlipidaemia induced by heated coconut oil. Naïve  
215 control group received only normal saline (10 mL/kg) throughout the experiment, the  
216 negative control group received heated oil and normal saline (10 mL/kg) whereas another  
217 group received unheated oil and normal saline (10 mL/kg). The relative liver weight  
218 (liver-to-body weight ratio) of the group that received only heated oil was significantly  
219 ( $P < 0.05$ ) higher compared to the naïve control and unheated oil group. This was,  
220 however, significantly ( $P < 0.05$ ) decreased by treatment with celecoxib and atorvastatin.  
221 The relative weights of other organs such as heart, kidney, lungs and spleen were not  
222 significantly affected as shown in Fig 1.

223

224 **Figure 1. Effect of celecoxib (CXB 5 and 10 mg/kg), atorvastatin (ATO 25 mg/kg)**  
225 **on the weight of (a) liver, (b) heart (c) kidney (d) lungs and (e) spleen in overheated-**

226 **oil induced hyperlipidemia in Sprague-Dawley rats.** Values are expressed as mean  $\pm$   
227 SEM (n=6). The symbols \* represents significant differences between treatment groups  
228 and heated oil only group ( $P<0.05$ ); # represents significant differences ( $P<0.05$ )  
229 between heated and unheated oil whereas † represents significant differences ( $P<0.05$ )  
230 between heated oil and naïve control group (all were compared using one-way ANOVA  
231 followed by Neuman Keals' *post hoc* test).

232

### 233 **Changes in haematological parameters**

234 The heated oil and the various drug treatments did not significantly alter haematological  
235 parameters such as the red blood cell count, haemoglobin, haematocrit, mean cell volume,  
236 mean cell haemoglobin concentration, platelet count, white blood cell count and its  
237 differentials as presented in Figs 2 and 3. However, there was a remarkable ( $P<0.05$ )  
238 increase in the platelet count (thrombocytosis) compared to the naïve control. This  
239 increase was also observed in the unheated oil treated group, though not significant  
240 ( $P>0.05$ ) (Figs 2 and 3).

241

242 **Figure 2. Effect of celecoxib (CXB 5 and 10 mg/kg), atorvastatin (ATO 25 mg/kg)**  
243 **on haematological parameters such as (a) white blood cells (b) red blood cells**  
244 **(RBCs) (c) haemoglobin (d) haematocrit (e) mean cell volume (MCV) (f) mean cell**  
245 **haemoglobin (g) mean cell haemoglobin concentration (MCHC) and (h) platelet in**  
246 **overheated-oil induced hyperlipidemia in Sprague-Dawley rats.** Values are expressed  
247 as mean  $\pm$  SEM (n=6). The † represents significant differences ( $P<0.05$ ) between heated  
248 oil and naïve control group (compared using one-way ANOVA followed by Neuman  
249 Keals' *post hoc* test).

250

251 **Figure 3. Effect of celecoxib (CXB 5 and 10 mg/kg), atorvastatin (ATO 25 mg/kg)**  
252 **on differential white blood cell parameters such as (a) neutrophils (b) lymphocytes**  
253 **(c) monocytes (d) eosinophils (e) basophils in overheated-oil induced hyperlipidemia**  
254 **in Sprague-Dawley rats.** Values are expressed as mean  $\pm$  SEM (n=6). There were no  
255 significant differences between treatment groups and the various controls (all were  
256 compared using one-way ANOVA followed by Neuman Keals' *post hoc* test).

257

## 258 **Changes in serum biochemical parameters**

259 Results presented in Fig 4 show alanine aminotransferase (ALT) and alkaline phosphatase  
260 (ALP) activities of rats fed with heated coconut oil were significantly ( $P<0.05$ ) higher  
261 than those of the naïve control. However, treatment with celecoxib (5 and 10 mg/kg)  
262 significantly ( $P<0.01$ ) reversed these elevations in the liver enzymes. Activities of  
263 aspartate aminotransferase (AST) enzyme as well as fasting blood glucose were however,  
264 not significant different among the various treatment groups.

265 With respect to urea however, treatment of rats with heated oil significantly reduced its  
266 levels compared to the naïve control as those treated with unheated oil. The decrease was  
267 however, significantly ( $P<0.05$ ) reversed to normal by both doses of celecoxib but not  
268 atorvastatin (Fig 4).

269

270 **Figure 4. Effect of celecoxib (CXB 5 and 10 mg/kg), atorvastatin (ATO 25 mg/kg)**  
271 **on serum lipid parameters such as (a) AST (b) ALT (c) ALP and (d) urea; and (e)**  
272 **fasting blood sugar in overheated-oil induced hyperlipidemia in Sprague-Dawley**  
273 **rats.** Values are expressed as mean  $\pm$  SEM (n=6). The symbols \* and \*\* represents

274 significant differences ( $P<0.05$  and  $P<0.01$  respectively) between treatment groups and  
275 heated oil only group; # represents significant differences ( $P<0.05$ ) between heated and  
276 unheated oil whereas † represents significant differences ( $P<0.05$ ) between heated oil  
277 and naïve control group (all were compared using one-way ANOVA followed by Neuman  
278 Keals' *post hoc* test).

279

## 280 **Changes in lipid profile**

281 Treatment of rats with heated oil only significantly ( $P<0.05$ ) elevated the levels of  
282 cholesterol, triglycerides, LDL as well as VLDL. All these parameters were significantly  
283 reversed by treatment with atorvastatin and celecoxib. The levels of high density  
284 lipoproteins (HDL) was not significantly affected compared to the controls despite the  
285 fact that the levels decreased in rats treated with unheated oil only (Fig 5).

286

287 **Figure 5. Effect of celecoxib (CXB 5 and 10 mg/kg), atorvastatin (ATO 25 mg/kg)**  
288 **on serum lipid parameters such as (a) cholesterol (b) triglycerides (c) low density**  
289 **lipoprotein (d) very low density lipoprotein and (e) high density lipoprotein**  
290 **cholesterol in overheated-oil induced hyperlipidemia in Sprague-Dawley rats.**

291 Values are expressed as mean  $\pm$  SEM (n=6). The symbols \* and \*\* represents significant  
292 differences ( $P<0.05$  and  $P<0.01$  respectively) between treatment groups and heated oil  
293 only group; # represents significant differences ( $P<0.05$ ) between heated and unheated  
294 oil whereas † represents significant differences ( $P<0.05$ ) between heated oil and naïve  
295 control group (all were compared using one-way ANOVA followed by Neuman Keals'  
296 *post hoc* test).

297

## 298 **Changes in cytokine levels**

299 Results presented in Figure show that treatment of rats with heated coconut oil did not  
300 induce significant changes in the levels both TNF- $\alpha$  as well as interleukin 1 $\beta$  compared  
301 with naïve control group. Additionally, the celecoxib as well as atorvastatin did not alter  
302 the levels of the cytokines significantly (Fig 6).

303

304

305 **Figure 6. Effect of celecoxib (CXB 5 and 10 mg/kg) and atorvastatin (ATO 25**  
306 **mg/kg) on the levels of serum cytokines such as (a) TNF- $\alpha$  and (b) IL-6 in**  
307 **overheated-oil induced hyperlipidemia in Sprague-Dawley rats.** Values are expressed  
308 as mean  $\pm$  SEM (n=6). There were no significant differences between heated oil and other  
309 treatment groups (all were compared using one-way ANOVA followed by Neuman  
310 Keals' *post hoc* test).

311

## 312 **Histopathological changes in the liver and aorta**

313 Photomicrographs shown in Fig 7 A contain a section of the liver of naïve control rats.  
314 The architecture of the liver is normal with congestion of central veins. The hepatocytes  
315 appear histologically normal without any evidence of degeneration, fatty change or  
316 necrosis. This is comparable to Fig 7 B which is section of a representative liver sample  
317 from rats that received unheated oil. The hepatocytes appear histologically normal  
318 without evidence of degeneration, fatty change or necrosis even though in some areas  
319 there are mild periportal chronic inflammatory infiltrates. Figure 7C shows a section of  
320 representative liver photomicrograph from the negative control group. Treatment with

321 heated oil only resulted in a poor dehydration of the tissue. The architecture of the liver  
322 was distorted in some areas and preserved elsewhere. There was intense congestion of  
323 central veins. Also, there was a large area of confluent necrosis with bridging, demarcated  
324 by only surrounding residual fibrocollagenous meshwork and surrounding central veins.  
325 There was also a proliferation of bile ductules around this area of infarction. The  
326 periportal vessels and the area surrounding the central vein shows intense chronic  
327 inflammatory changes. This is a case of massive necrosis with ductular reaction and  
328 hepatitis as shown in Fig 7 C. Treatment with atorvastatin (ATO 25 mg/kg) restored the  
329 hepatocytes and histoarchitecture of the liver to normal as shown in Figure 7D. Although  
330 sections of the liver tissue showed poor dehydration in this group, the architecture of the  
331 liver was normal despite the congestion of the central veins. Overall, the hepatocytes  
332 appeared histologically normal without evidence of degeneration, fatty change or  
333 necrosis. With rats treated with low dose celecoxib (CXB 5 mg/kg), sections of liver  
334 showed poor dehydration of tissue. The architecture of the liver was normal with  
335 congestion of central veins. The hepatocytes appeared histologically normal without  
336 evidence of degeneration, fatty change or necrosis. In some areas, there were mild  
337 periportal chronic inflammatory infiltrates. However, the tissue could be said to be  
338 histologically normal and this possibly show evidence of recovery following sub-chronic  
339 administration of heated oil as shown in Fig 7 E. The high dose celecoxib (CXB 10  
340 mg/kg), however, showed mild chronic hepatitis as shown in Fig 7 F. Sections of the liver  
341 showed poor dehydration of tissue. The architecture of the liver was normal with  
342 congestion of central veins and the hepatocytes appeared histologically normal without  
343 evidence of degeneration, fatty change or necrosis. In some areas, there were moderate  
344 periportal chronic inflammatory infiltrates dominated by groups of lymphocytes that  
345 formed aggregates in those areas. There were no associated bridging or evidences of

346 fibrosis.

347 Photomicrographs presented in Fig 8 show the cross section of aorta of various  
348 representative samples from various treatment groups. Naïve control rats that received  
349 only normal saline without any drug treatment had a histologically normal aorta and  
350 perivascular tissues as shown in Fig 8 A. Sections show cross sections of the aorta with  
351 surrounding fibrofatty tissue. The lumen of the aorta has a collection of red blood cells  
352 with the wall of the aorta appearing histologically normal. With the group that received  
353 only unheated oil, the aorta and perivascular tissue appeared histologically normal as  
354 shown in Fig 8 B. The photomicrograph shows cross sections and longitudinal sections  
355 of the aorta with surrounding fibrofatty tissue and a lymph node. The lumen of the aorta  
356 has a collection of red blood cells. The wall of the aorta appears histologically normal.  
357 Sections presented in Fig 8 C are representative cross sections from rats that received  
358 only heated oil. The section shows arteries adjacent to an airway with cartilage within its  
359 wall and lined by respiratory type epithelium. There is an adjacent lymph node in a  
360 fibrofatty stroma. The tissue is poorly dehydrated. There are chronic inflammatory  
361 changes within the wall of some small to medium sized venules close to the larger arteries.  
362 Though the aorta and the perivascular tissue are normal, there is isolated perivascular  
363 inflammation. Again, Fig 8 D show a cross section of arteries adjacent to an airway with  
364 cartilage within its wall and lined by respiratory type epithelium. There is an adjacent  
365 lymph node in a fibrofatty stroma. The tissue is poorly dehydrated with chronic  
366 inflammatory changes within the perivascular fat. This is normal aorta and perivascular  
367 tissue. Section of from the aortic tissue of rats treated with low dose celecoxib (CXB 5  
368 mg/kg) as presented on Fig 8 E show cross sections of the aorta with surrounding  
369 fibrofatty tissue and a lymph node. The lumen of the aorta has a collection of red blood  
370 cells. The wall of the aorta appears histologically normal. The periaortic fat has cellular



371 areas containing vacuolated adipocytes with features of blast cells. Similarly, a cross  
372 section of the aorta of rats treated with high dose celecoxib (CXB 10 mg/kg) showed the  
373 lumen of the aorta has a collection of red blood cells with surrounding fibrofatty tissue.  
374 The wall of the aorta appears histologically normal. The periaortic fat has cellular areas  
375 containing vacuolated adipocytes with features of blast cells. The aorta and the  
376 perivascular tissues appear histologically normal (Fig 8 F).

377

378 **Figure 7: Photomicrograph of liver section of representative rat in (A) naïve control**  
379 **group (B) unheated oil treated group (C) heated oil only treated group as negative**  
380 **control, (D) heated oil in addition to atorvastatin 25 mg/kg (E) heated oil in addition**  
381 **to celecoxib 5 mg/kg and (F) heated oil in addition to celecoxib 10 mg/kg (H & E,**  
382 **×40).**

383

384 **Figure 8: Photomicrograph of section of aorta of representative rat in (A) naïve**  
385 **control group (B) unheated oil treated group (C) heated oil only treated group as**  
386 **negative control, (D) heated oil in addition to atorvastatin 25 mg/kg (E) heated oil in**  
387 **addition to celecoxib 5 mg/kg and (F) heated oil in addition to celecoxib 10 mg/kg (H**  
388 **& E, ×40).**

389

390

## 391 **Discussion**

392 The global increase in the incidence of cardiovascular events continues to present a major  
393 public health issue because treatment remains suboptimal. Evidence abounds that lipid  
394 lowering therapy with statins (or ezetimibe in combination with a statin) contributes to

395 reducing major adverse cardiovascular events. In spite of this, substantial risk of  
396 cardiovascular events remains even among patients receiving statin therapy whose LDL-  
397 C is <70 mg/dL [29, 30]. Alternative strategies are also required to lower lipids in patients  
398 who experience adverse effects on maximally tolerated statin therapy. These challenges  
399 call for innovations in the field of dyslipidaemia to address the several areas of unmet  
400 need [29].

401 Recent studies have demonstrated the association between increase in the expression of  
402 COX-2 and the development of metabolic disorders including obesity, diabetes mellitus,  
403 and non-alcoholic fatty liver disease (NAFLD). Studies have also shown that COX-2  
404 activity not only has influence on insulin sensitivity [31], but also acts as pro-  
405 inflammatory mediator during the progression of NAFLD [32]. This latter has gained  
406 prominence as part of the possible mechanisms contributing to the protective effect of  
407 celecoxib against the development of NAFLD. Many studies suggested that celecoxib  
408 could attenuate liver steatosis and inflammation in NAFLD [33]. We also observed the  
409 ability of celecoxib to lower plasma cholesterol and attenuate hepatic lipid peroxidation  
410 in CCl<sub>4</sub>-mediated hepatotoxicity in rats [27]. In this study, we examined if the observed  
411 hypocholesterolaemic property of celecoxib in our previous study was unrelated to its  
412 hepatoprotective effect by evaluating its lipid lowering potential in rats fed with high fat  
413 (heated coconut oil) and without chemically-mediated induction of hepatic injury.

414 The results presented in Figure 1 describe the effect of celecoxib (CXB 5 and 10 mg/kg)  
415 and atorvastatin (ATO 25 mg/kg) on hyperlipidaemia induced by heated coconut oil.  
416 Naïve control group received only normal saline (10 mL/kg) throughout the experiment,  
417 the negative control group received heated oil and normal saline (10 mL/kg) whereas  
418 another group received unheated oil and normal saline (10 mL/kg). The relative liver  
419 weight (liver-to-body weight ratio) of the group that received only heated oil was

420 significantly ( $P < 0.05$ ) higher compared to the naïve control and unheated oil group. This  
421 was, however, significantly ( $P < 0.05$ ) decreased by treatment with celecoxib and  
422 atorvastatin. The relative weights of other organs such as heart, kidney, lungs and spleen  
423 were not significantly affected as shown in Figure 1. Generally, when oil is subjected to  
424 high temperature heating, free radicals are generated [34]. This may lead to several  
425 pathological changes in some organs as seen in the significantly increased weight of the  
426 liver. This remarkable increase in liver-to-body weight ratio has been attributed to the  
427 ability of the oil to increase liver microsomal lipid composition resulting in fatty liver  
428 [35].

429 Earlier reports suggests that there is strong correlations (both positive and negative)  
430 between the haematological parameters and the different lipid parameters [36]. Despite  
431 this fact, with the exception of platelet count, none of the haematological parameters  
432 assessed in the study was significantly affected (Figures 2 and 3). There was, however, a  
433 remarkable ( $P < 0.05$ ) increase in the platelet count (thrombocytosis) observed the group  
434 treated with heated oil only compared to the naïve control. This increase was also  
435 observed in the unheated oil treated group, though not significant. Among the causes of  
436 thrombocytosis is oxidative stress, inflammation, trauma, heart attack, cancer and burns  
437 [37]. We observed that celecoxib, but not atorvastatin, decreased the platelet count,  
438 although this effect was not statistically significant. This effect could be attributed to the  
439 anti-inflammatory effect of celecoxib in addition to its ability to ameliorate oxidative  
440 stress as reported earlier by Ekor *et al.* [27].

441 Results presented in Figure 4 show alanine aminotransferase (ALT) and alkaline  
442 phosphatase (ALP) activities of rats fed with heated coconut oil were significantly  
443 ( $P < 0.05$ ) higher than those of the naïve control. This is an indication of a possible  
444 hepatocellular damage [38]. The ALT enzyme is distributed in many tissues, but higher

445 levels are present in the liver with elevated serum levels found in hepatocellular disorders  
446 than in intrahepatic or extra-hepatic cholestatic disorders 65. This result also confirms the  
447 possible involvement of liver disease and hypercholesterolaemia [27, 38]. Low and high  
448 doses of celecoxib significantly (all  $P < 0.01$ ) reversed this effect and this could be pointing  
449 to an ameliorative or protective effect of celecoxib against liver dysfunction associated  
450 with hyperlipidaemia.

451 Furthermore, we observed that sub-chronic administration of heated oil produced a  
452 significant decrease in blood urea levels in the rats. This decrease was significantly  
453 reversed by celecoxib. Although not very common, a decrease in urea levels could reflect  
454 severe liver disease [39]. Rather obvious and significant ( $P < 0.05$  for all) was the increase  
455 in total cholesterol levels, triglyceride levels, LDL, and VLDL levels in the heated oil  
456 treated group as shown in Figure 5. Treatment with atorvastatin and celecoxib  
457 significantly ( $p < 0.05$ ) ameliorated this effect. Hyperlipidaemia with a noticeable increase  
458 of low-density lipoprotein (LDL) cholesterol levels is common in patients with chronic  
459 cholestatic liver disease [39]. Therefore, the corresponding increase in ALT is not  
460 surprising though an increase in AST should have been expected. Some lipoproteins  
461 (notably those containing apoprotein B-100) are retained in the sub-endothelial space, by  
462 means of a charge-mediated interaction with extracellular matrix and proteoglycans [40].  
463 This allows reactive oxygen species to modify the surface phospholipids and unesterified  
464 cholesterol of the small LDL particles. Because of LDL oxidation, isoprostanes are  
465 formed [41]. Vasoconstriction in the setting of high levels of oxidized LDL appear to be  
466 associated with a reduced release of the vasodilator nitric oxide from the damaged  
467 endothelial wall as well as increased platelet aggregation and thromboxane release [38,  
468 42]. The state of hypercholesterolaemia leads invariably to an excess accumulation of  
469 oxidized LDL within the macrophages, thereby transforming them into "foam" cells. The

470 rupture of these cells can lead to further damage of the vessel wall due to the release of  
471 oxygen free radicals, oxidized LDL, and intracellular enzymes [42].

472 Abnormal production of some cytokines such as tumour necrosis factor (TNF)- $\alpha$ ,  
473 interleukin-1-beta (IL-1 $\beta$ ), soluble IL-2 receptor (sIL-2R), IL-6, and chemokine IL-8  
474 have been implicated in the pathogenesis of various inflammatory and autoimmune  
475 diseases [43]. When the sera of animals treated with heated oil were tested for serum  
476 cytokines (IL-6 and TNF- $\alpha$ ), levels were not significantly ( $P > 0.05$  for both) affected as  
477 shown in Figure 6. Though many *in vivo* studies have demonstrated that TNF- $\alpha$  and IL-6  
478 are important components of the pro-inflammatory response [43], this was not observed  
479 in our study.

480 Since the liver was the only organ whose relative weight was significantly affected by the  
481 various treatments, it was expedient to conduct a histopathological study on them. This  
482 falls in line the recommendation of the Society for Pathology and Toxicology (STP) that  
483 organ weights should be interpreted alongside histopathology [44]. Results obtained  
484 from the histology of the tissues show a distorted architecture of the liver intense  
485 congestion of central veins. Also, a large area of confluent necrosis with bridging,  
486 demarcated by only surrounding residual fibrocollagenous meshwork and surrounding  
487 central veins was observed. The periportal vessels and the area surrounding the central  
488 vein showed intense chronic inflammatory changes. This is a case of massive necrosis  
489 with ductular reaction and hepatitis. Treatment with celecoxib and atorvastatin, however,  
490 reversed to a very large extent this damage. This corroborates with the findings on the  
491 effect of the test drugs on liver enzymes such as ALT and ALP which are important  
492 markers of liver damage [45].

493 Though the aorta of the rats that received heated oil only was normal to a large extent,

494 there were isolated spots of perivascular inflammation as well as fibrofatty stroma of the  
495 surrounding tissues. These were resolved to a large extent following treatment with  
496 celecoxib and atorvastatin.

## 497 **Conclusion**

498 Celecoxib exhibited an attenuating effect on hyperlipidaemia and liver injury associated  
499 with sub-chronic ingestion of high fat (heated oil) in rats. Overall, findings from this study  
500 suggest that celecoxib, in addition to its established anti-inflammatory property, may be  
501 of therapeutic benefit in dyslipidaemia or related metabolic diseases and their attendant  
502 complications.

503

## 504 **Acknowledgements**

505 The authors gratefully acknowledge Messrs. John K. Afortude, Wisdom Ahlidja and  
506 Joseph Aqua-Mills, of the Department of Pharmacology, School of Medical Sciences,  
507 University of Cape Coast, Cape Coast, Ghana, for their technical support.

508

## 509 **Funding**

510 This study was funded by the University of Cape Coast through the Directorate of  
511 Research, Innovation and Consultancy (DRIC) research grant (Grant reference:  
512 RSG/GRP/CoHAS/2018/102).

513

## 514 **Declaration of competing interests**

515 The authors declare that they have no competing interests.

516

## 517 **Authors' contributions**

518 ME: involved in conception and design of study, data analysis, revision of final draft of  
519 manuscript for important intellectual content, and submitted final manuscript. PEOA:  
520 involved in design of study, data analysis, revision of draft manuscript, and approved  
521 final manuscript for submission. EO: involved in design of study, data analysis, revision  
522 of draft manuscript, and approved final manuscript for submission. RPB: involved in  
523 design of study, data analysis, revision of draft manuscript, and approved final manuscript  
524 for submission. ITH: contributed to study design, data collection and analysis, drafted the  
525 manuscript and approved final manuscript for submission. MAA: contributed to data  
526 collection and analysis, and approved final manuscript for submission. GO: contributed  
527 to animal handling and data collection. ESY: involved in study design, revision of draft  
528 manuscript, and approved final manuscript for submission. PKA: contributed to data  
529 analysis, revised and approved the final submission of the manuscript.

530

531

532

533

534

535

536

537

538

539

540

541 **References:**

- 542 1. Joo IW, Ryu JH, Oh HJ. The influence of Sam-Chil-Geun (*Panax notoginseng*)  
543 on the serum lipid levels and inflammations of rats with hyperlipidemia induced  
544 by poloxamer-407. *Yonsei Med J.* 2010; 51(4):504-10.
- 545 2. Mc Namara K, Alzubaidi H, Jackson JK. Cardiovascular disease as a leading  
546 cause of death: how are pharmacists getting involved? *Integr Pharm Res Pract.*  
547 2019;8:1–11.
- 548 3. Kraakman MJ, Dragoljevic D, Kammoun HL, Murphy AJ. Is the risk of  
549 cardiovascular disease altered with anti-inflammatory therapies? Insights from  
550 rheumatoid arthritis. *Clin Transl Immunol.* 2016. 5(5);e84;  
551 doi:10.1038/cti.2016.31
- 552 4. Stone NJ, Robinson J, Lichtenstein AH., Bairey Merz CN, Lloyd-Jones DM,  
553 Blum CB, *et al.* ACC/AHA guideline on the treatment of blood cholesterol to  
554 reduce atherosclerotic cardiovascular risk in adults: a report of the American  
555 College of Cardiology/American Heart Association Task Force on Practice  
556 Guidelines. *J Am Coll Cardiol.* 2013;63(25 Pt B):2889–934.
- 557 5. Perk J, De Backer G, Gohlke H, Graham I, Reiner Z, Verschuren M. European  
558 Association for Cardiovascular Prevention and Rehabilitation (EACPR), ESC  
559 Committee for Practice, *et al.* European guidelines on cardiovascular disease  
560 prevention in clinical practice (version 2012). The Fifth Joint Task Force of the  
561 European Society of Cardiology and Other Societies on Cardiovascular Disease  
562 Prevention in Clinical Practice (constituted by representatives of nine societies  
563 and by invited experts). *Eur Heart J.* 2012;13(13):635–701.



- 564 6. WHO 2008. WHO. The World Health report. WHO; Geneva: 2008.  
565 Cardiovascular disease. Available from:  
566 [www.who.int/cardiovascular.diseases/en/](http://www.who.int/cardiovascular.diseases/en/) [2019 September 9th]
- 567 7. Mbikay M. Therapeutic potential of Moringa oleifera leaves in chronic  
568 hyperglycemia and dyslipidemia: a review. *Front Pharmacol.* 2012;3:24.
- 569 8. Nelson RH. Hyperlipidemia as a risk factor for cardiovascular disease. *Prim*  
570 *Care.* 2012;40(1):195-211.
- 571 9. Jou J, Choi SS, Diehl AM. Mechanisms of disease progression in nonalcoholic  
572 fatty liver disease. *Semin Liver Dis.* 2008;28:370–9.
- 573 10. Liao XH, Cao X, Liu J, Xie XH, Sun YH, Zhong BH. Prevalence and features of  
574 fatty liver detected by physical examination in Guangzhou. *World J*  
575 *Gastroenterol.* 2013;19(32):5334-9.
- 576 11. Al Mamun A, Hashimoto M, Katakura M, Tanabe Y, Tsuchikura S, Hossain S,  
577 Shido O. Effect of dietary n-3 fatty acids supplementation on fatty acid  
578 metabolism in atorvastatin-administered SHR.Cg-Lep<sup>rcp</sup>/ND<sup>mcr</sup> rats, a  
579 metabolic syndrome model. *Biomed Pharmacother.* 2017;85:372-9.
- 580 12. Rang HP, Ritter JM, Flower RJ, Henderson G. *Rang & Dale's Pharmacology E-*  
581 *Book: with STUDENT CONSULT Online Access.* 2014. Elsevier Health Sciences.
- 582 13. Kourounakis AP, Victoratos P, Peroulis N, Stefanou N, Yiangou M, Hadjipetrou  
583 L, Kourounakis PN. Experimental hyperlipidemia and the effects of NSAIDS.  
584 *Exp Mol Pathol.* 2002;73:135-8.
- 585 14. Livshits A, Seidman DS. Role of Non-Steroidal Anti-Inflammatory Drugs in  
586 Gynecology. *Pharmaceuticals.* 2010;3:2082-9.

- 587 15. Ahmed S, Gul S, Zia-UI-Haq M, Riaz M. Hypolipidemic effects of nimesulide  
588 and celecoxib in experimentally induced hypercholesterolemia in rabbits. *Turk J*  
589 *Med Sci.* 2015;45:277-83
- 590 16. Foxworthy PS, Perry DN, Eacho PI. Induction of peroxisomal beta-oxidation by  
591 nonsteroidal anti-inflammatory drugs. *Toxicol Appl Pharmacol.*  
592 1993;118(2):271-4.
- 593 17. Gansevoort PT, Heeg JE, Dikkeschei FD, de Zeeuw D, de Jong PE, Dullaart RFF.  
594 Symptomatic antiproteinuric treatment decreases serum lipoprotein (A)  
595 concentration in patients with glomerular proteinuria. *Nephrol Dial Transplant.*  
596 1994;9(3):244-50.
- 597 18. Stoller DK, Grorud CB, Michalek V, Buchwald H. Reduction of Atherosclerosis  
598 with Nonsteroidal Anti-Inflammatory Drugs. *J Surg Res.* 1993;54(1):7-11.
- 599 19. Dhawan V, Ganguly NK, Majumdar S, Chakavarti RN. Effect of indomethacin  
600 on serum lipids, lipoproteins, prostaglandins and the extent and severity of  
601 atherosclerosis in rhesus monkeys. *Can J Cardiol.* 1992; 8(3):306-12.
- 602 20. Belton O, Fitzgerald DJ. Cyclooxygenase isoforms and atherosclerosis.  
603 *Expert Rev Mol Med.* 2003;5(9):1-18.
- 604 21. FitzGerald GA, Patrono C. The coxibs, selective inhibitors of cyclooxygenase-2.  
605 *N Engl J Med.* 2001; 345(6): 433-42.
- 606 22. Graham DJ, Campen D, Hui R, Spence M, Cheetham C, Levy G, Shoor S, et al.  
607 Risk of acute myocardial infarction and sudden cardiac death in patients treated  
608 with cyclo-oxygenase 2 selective and non-selective non-steroidal anti-  
609 inflammatory drugs: nested case-control study. *Lancet.* 2005;365(9458):475-81.

- 610 23. Hudson M, Richard H, Pilote L Differences in outcomes of patients with  
611 congestive heart failure prescribed celecoxib, rofecoxib, or non-steroidal anti-  
612 inflammatory drugs: population based study. *Bri Med J.* 2005;330(7504):1370.
- 613 24. McGettigan P, Henry D. Cardiovascular risk and inhibition of cyclooxygenase: a  
614 systematic review of the observational studies of selective and nonselective  
615 inhibitors of cyclooxygenase 2. *JAMA.* 296(13), 1633-644.
- 616 25. Kristensen LE, Jakobsen AK, Askling J, Nilsson F, Jacobsson LT. Safety of  
617 etoricoxib, celecoxib, and nonselective nonsteroidal antiinflammatory drugs in  
618 ankylosing spondylitis and other spondyloarthritis patients: a Swedish national  
619 population-based cohort study. *Arthritis Care Res.* 2015;67(8):1137-49.
- 620 26. Friend M, Vucenik I, Miller M. Platelet responsiveness to aspirin in patients with  
621 hyperlipidaemia. *Br Med J.* 2003;326:82-3.
- 622 27. Ekor M, Odewabi AO, Kale OE, Adesanoye OA, Bamidele TO. Celecoxib, a  
623 selective cyclooxygenase-2 inhibitor, lowers plasma cholesterol and attenuates  
624 hepatic lipid peroxidation during carbon-tetrachloride-associated hepatotoxicity  
625 in rats. *Drug Chem Toxicol.* 2013;36(1):1-8.
- 626 28. Garber JC, Barbee RW, Bielitzki JT, Clayton L, Donovan J, Hendriksen C, et al.  
627 Guide for the care and use of laboratory animals. *The National Academic Press,*  
628 *Washington DC* 8: 220.
- 629 29. Graham I, Shear C, Graeff PD, Boulton C, Catapano AL, Stough WG, et al. New  
630 strategies for the development of lipid-lowering therapies to reduce  
631 cardiovascular risk. *Eur Heart J.* 2018;4:119–27.
- 632 30. Robinson JG, Huijgen R, Ray K, Persons J, Kastelein JJ, Pencina MJ.  
633 Determining when to add nonstatin therapy: a quantitative approach. *J Am Coll*  
634 *Cardiol.* 2016;68:2412–21.

- 635 31. Chen X, Xu S, Wei S, Deng Y, Li Y, Yang F, et al. Comparative Proteomic Study  
636 of Fatty Acid-treated Myoblasts Reveals Role of Cox-2 in Palmitate-induced  
637 Insulin Resistance. *Sci Rep.*2016; 6:21454.
- 638 32. Yu J, Ip E, Dela Peña A, Hou JY, Sessa J, Pera N, et al. COX-2 induction in mice  
639 with experimental nutritional steatohepatitis: Role as pro-inflammatory mediator.  
640 *Hepatology.* 2006; 43:826–836.
- 641 33. Chen J, Liu D, Bai Q, Song J, Guan J, Gao J, et al. Celecoxib attenuates liver  
642 steatosis and inflammation in non-alcoholic steatohepatitis induced by high-fat  
643 diet in rats. *Mol Med Rep.* 2011;4:811–816.
- 644 34. Adam SK, Das S, Soelaiman IN, Umar NA, Jaarin K. Consumption of repeatedly  
645 heated soy oil increases the serum parameters related to atherosclerosis in  
646 ovariectomized rats. *Tohoku J Exp Med.* 2008;215(3):219-26.
- 647 35. de la Casa E, Perez-Gonzalez N, Sanchez-Bernal C, Llanillo M, Effects of dietary  
648 oil related to the toxic oil syndrome on the lipids of guinea pig liver microsomes.  
649 *Lipids.* 1995;30(6):575-9
- 650 36. Antwi-Baffour S, Kyeremeh R, Boateng SO, Annison L, Seidu MA.  
651 Haematological parameters and lipid profile abnormalities among patients with  
652 Type-2 diabetes mellitus in Ghana. *Lipids Health Dis.* 2018;17(1):1-9.
- 653 37. Torregrosa JM, Ferrer-Marin F, Lozano ML, Moreno MJ, Martinez C, Anton AI,  
654 et al. Impaired leucocyte activation is underlining the lower thrombotic risk of  
655 essential thrombocythaemia patients with CALR mutations as compared with  
656 those with the JAK2 mutation. *Bri J Haematol.* 2016;172(5):813-815.
- 657 38. Longo M, Crosignani A, Podda M. Hyperlipidemia in Chronic Cholestatic Liver  
658 Disease. *Curr Treat Options Gastroenterol.* 2001;4(2):111-4.

- 659 39. Waring WS, Stephen AFL, Robinson ODG, Dow MA, Pettie JM. Serum urea  
660 concentration and the risk of hepatotoxicity after paracetamol overdose. *QJM*.  
661 2008;101(5):359–63.
- 662 40. Skalen K, Gustafsson M, Rydberg EK. Subendothelial retention of atherogenic  
663 lipoproteins in early atherosclerosis. *Nature*. 2002;417:750-4.
- 664 41. Reilly MP, Pratico D, Delanty N, DiMinno G, Tremoli E, Rader. Increased  
665 formation of distinct F2 isoprostanes in hypercholesterolemia. *Circulation*. 1998;  
666 98(25):2822-8.
- 667 42. Ross R. The pathogenesis of atherosclerosis: a perspective for the 1990s. *Nature*.  
668 1993;362(6423):801-9.
- 669 43. Evereklioglu C, Er H, Türköz Y, Cekmen M. Serum levels of TNF-alpha, sIL-2R,  
670 IL-6, and IL-8 are increased and associated with elevated lipid peroxidation in  
671 patients with Behçet's disease. *Mediators Inflamm*. 2002;11(2):87-93.
- 672 44. Sellers RS, Mortan D, Michael B, Roome N, Johnson JK, Yano BL. Society of  
673 Toxicologic Pathology position paper: organ weight recommendations for  
674 toxicology studies. *Toxicol Pathol*. 2007;35(5):751-5.
- 675 45. Gaw A, Murphy M, Srivastava R, Cowan RA, O'Reilly DSJ. *Clinical*  
676 *Biochemistry E-Book: An Illustrated Colour Text*: Elsevier Health Sciences. 2013.  
677  
678  
679  
680  
681  
682

**a**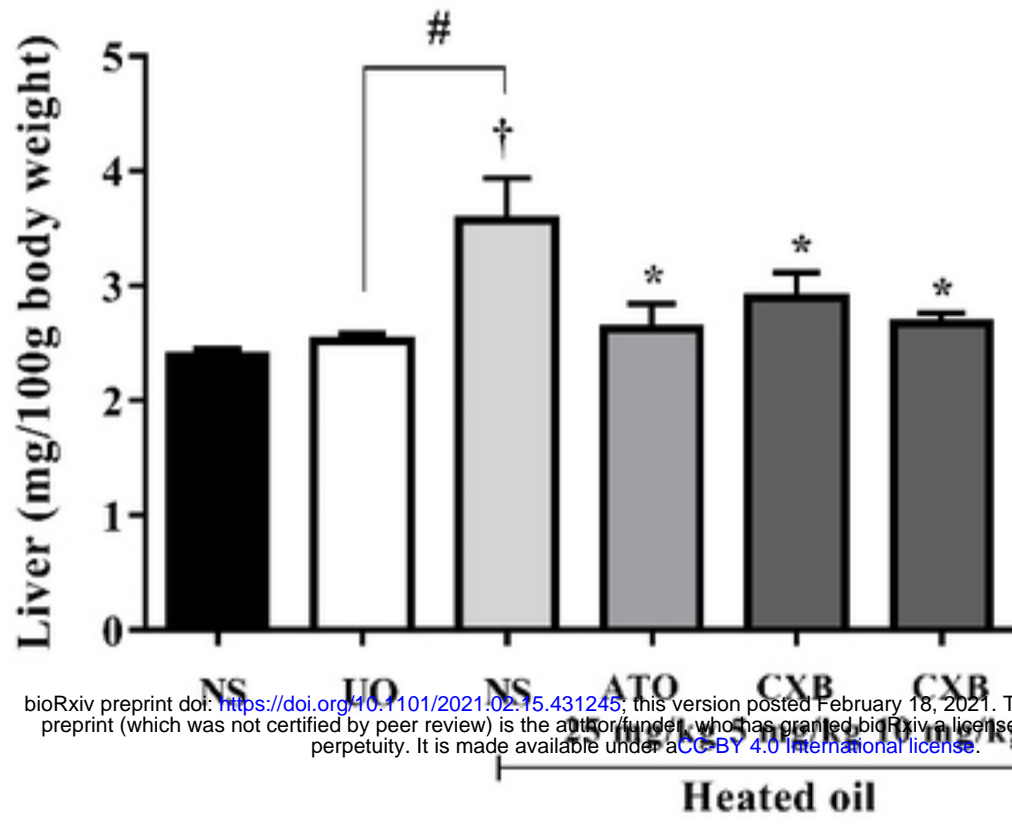**b**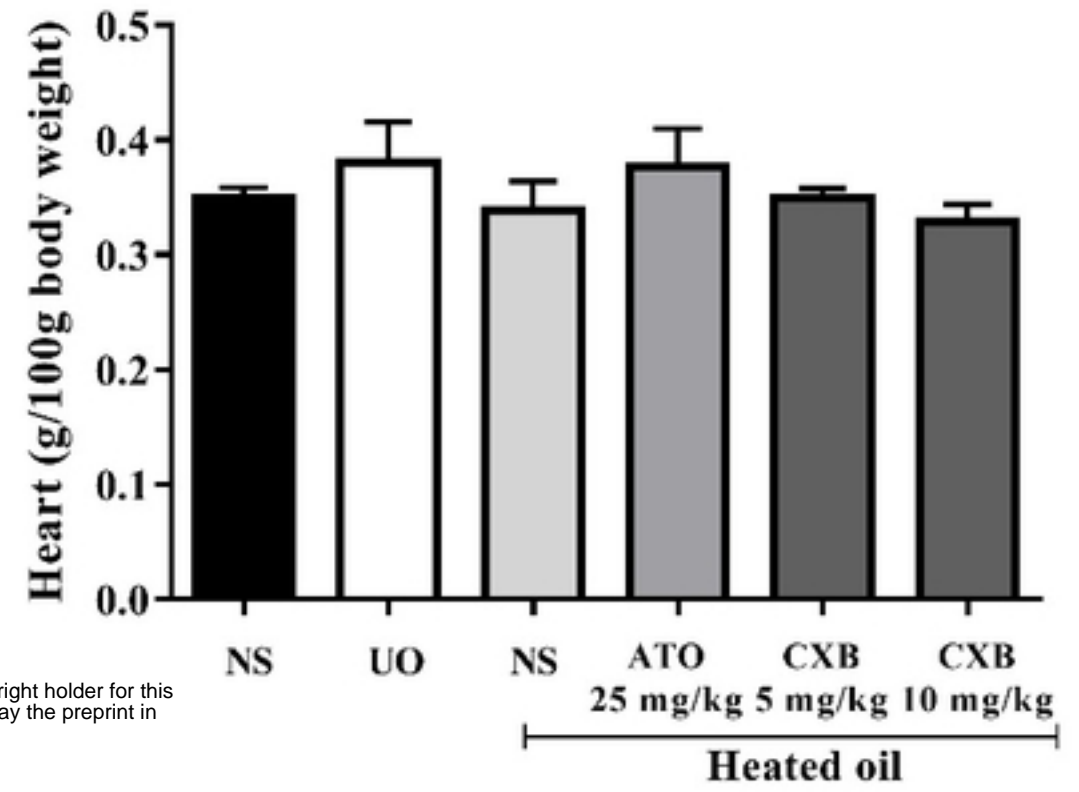**c**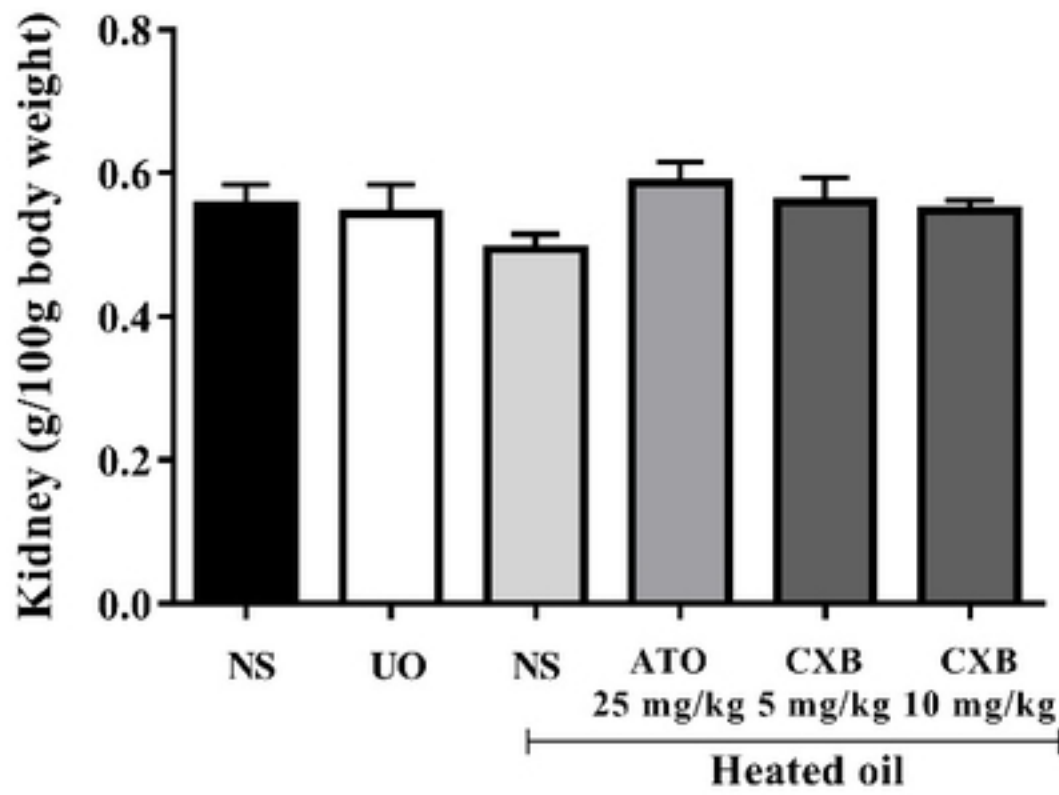**e**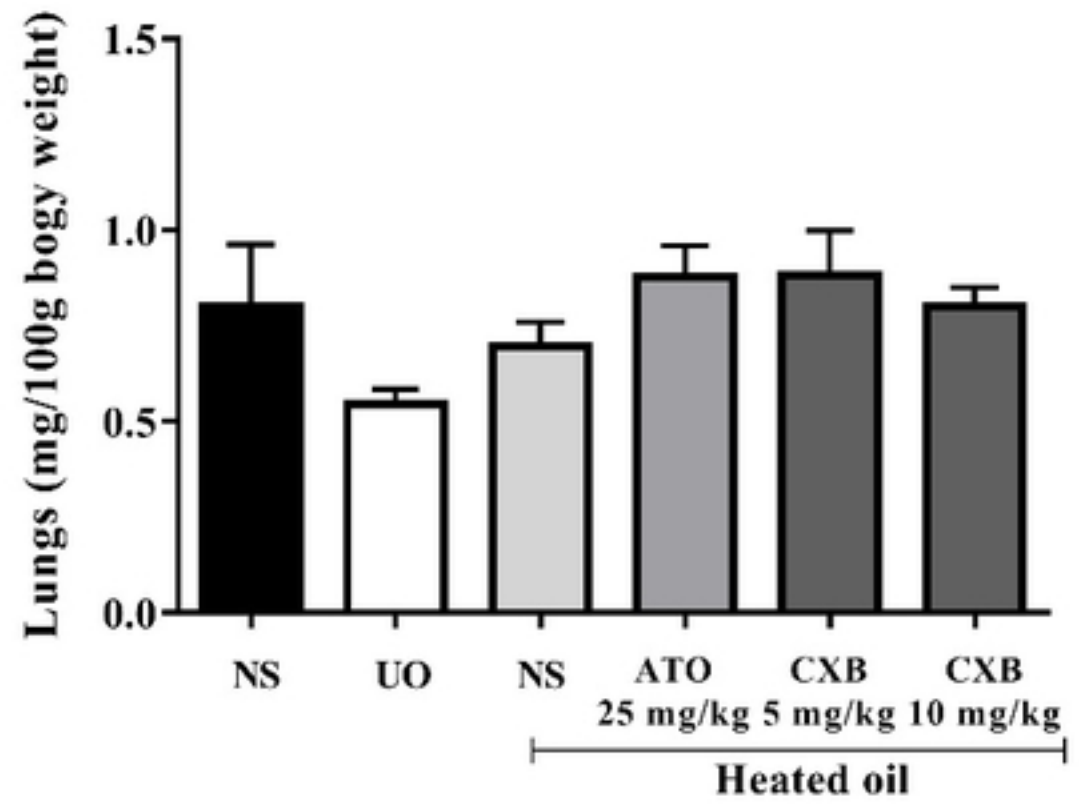**f**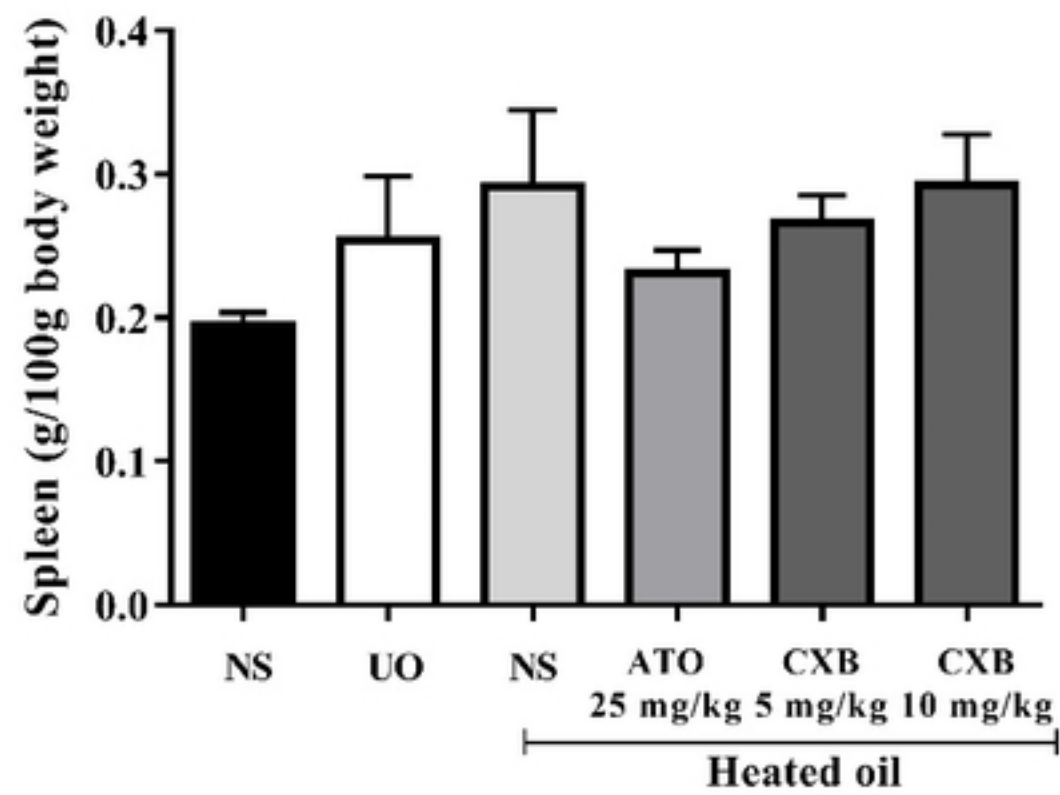

**a**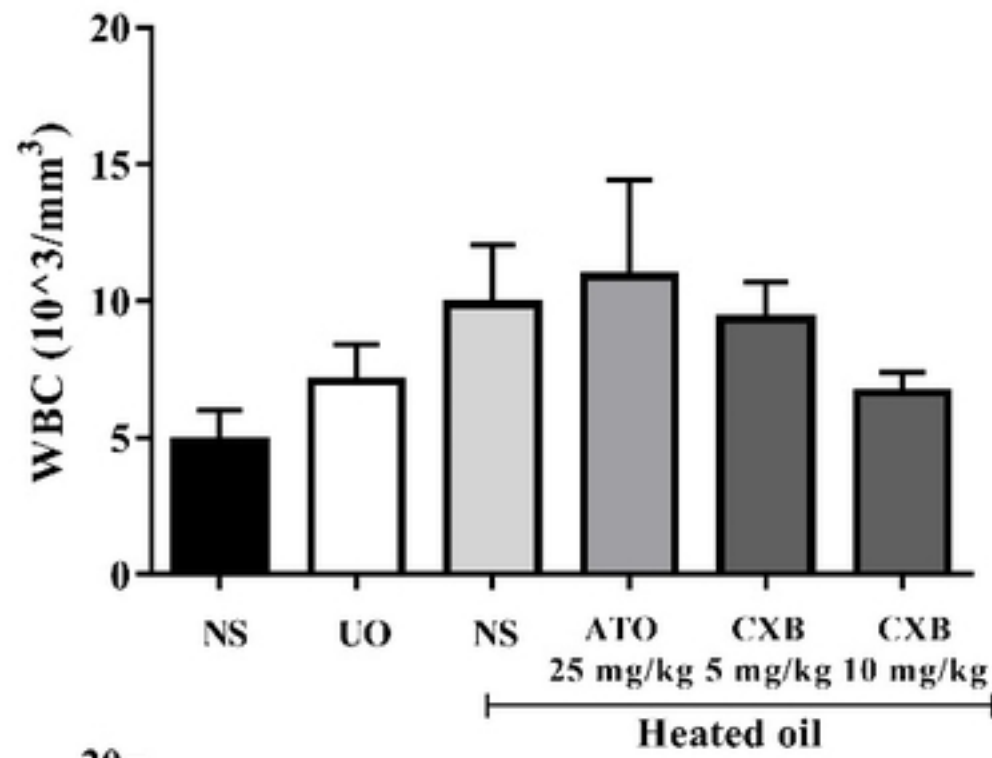**b**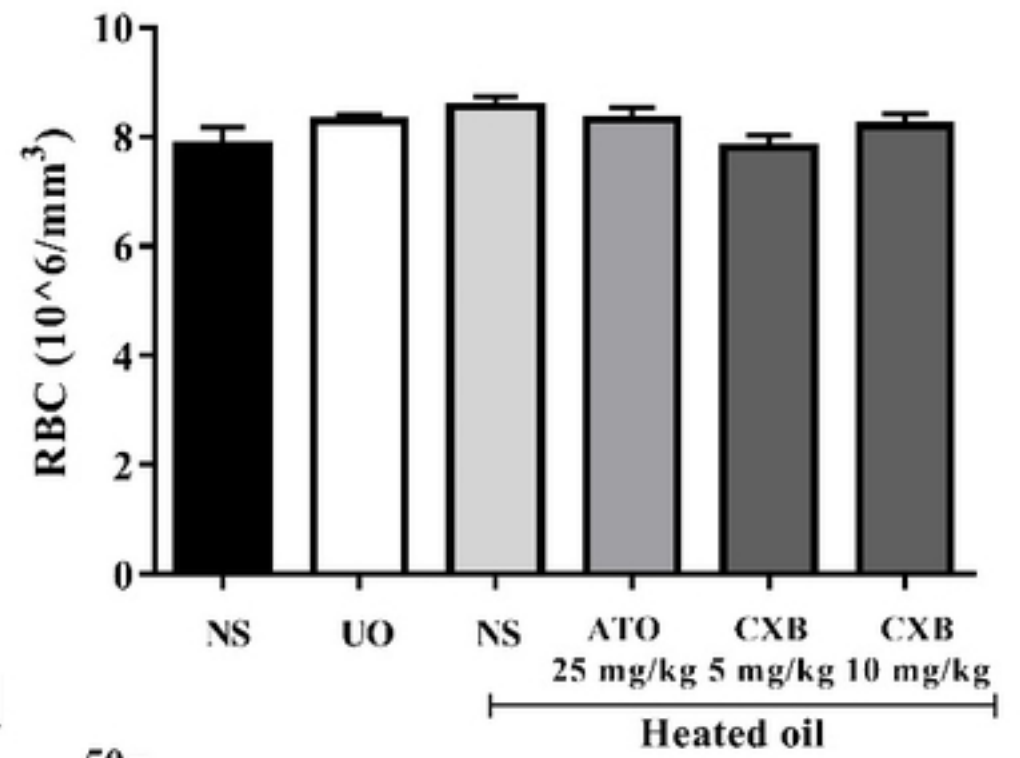**c**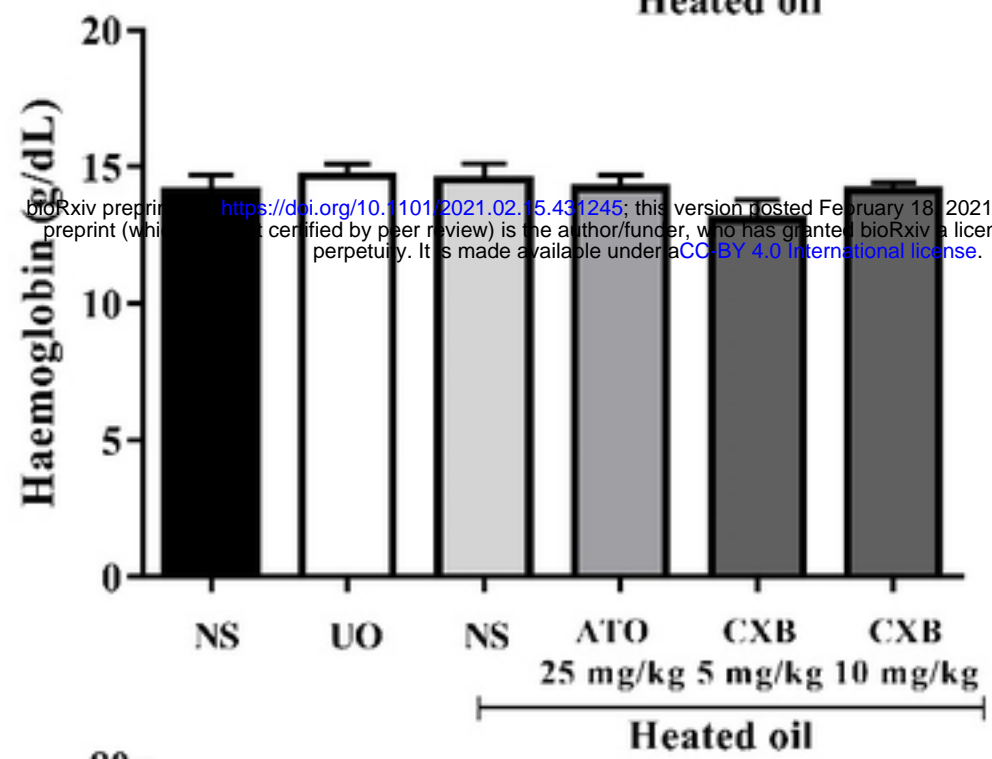**d**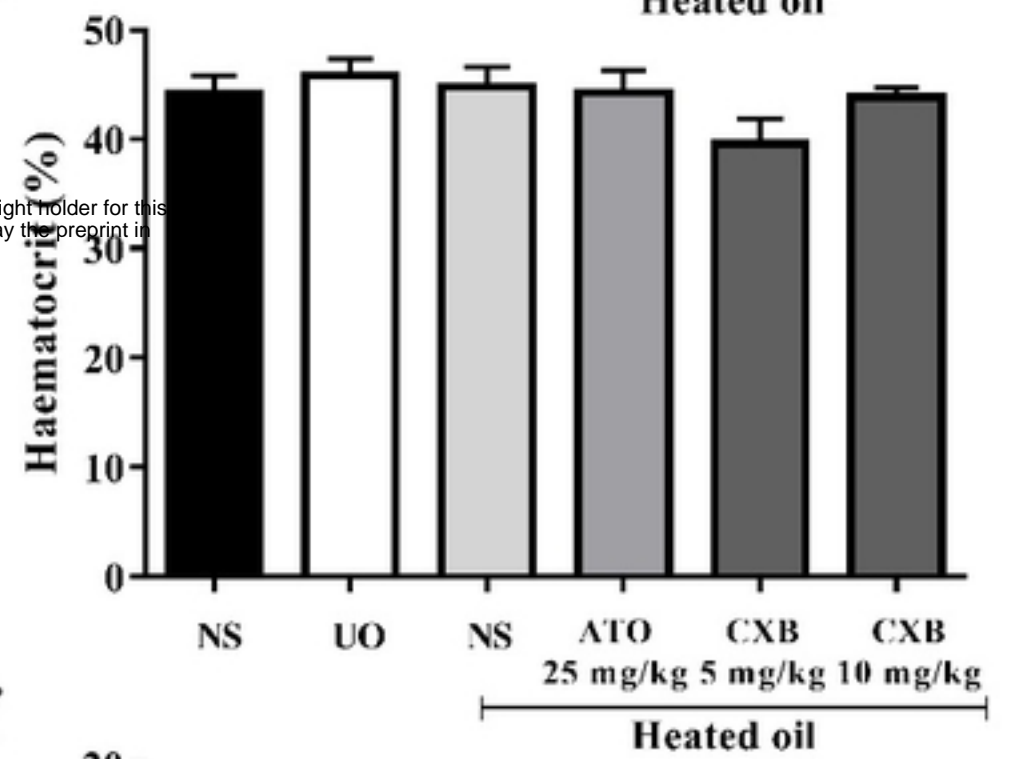**e**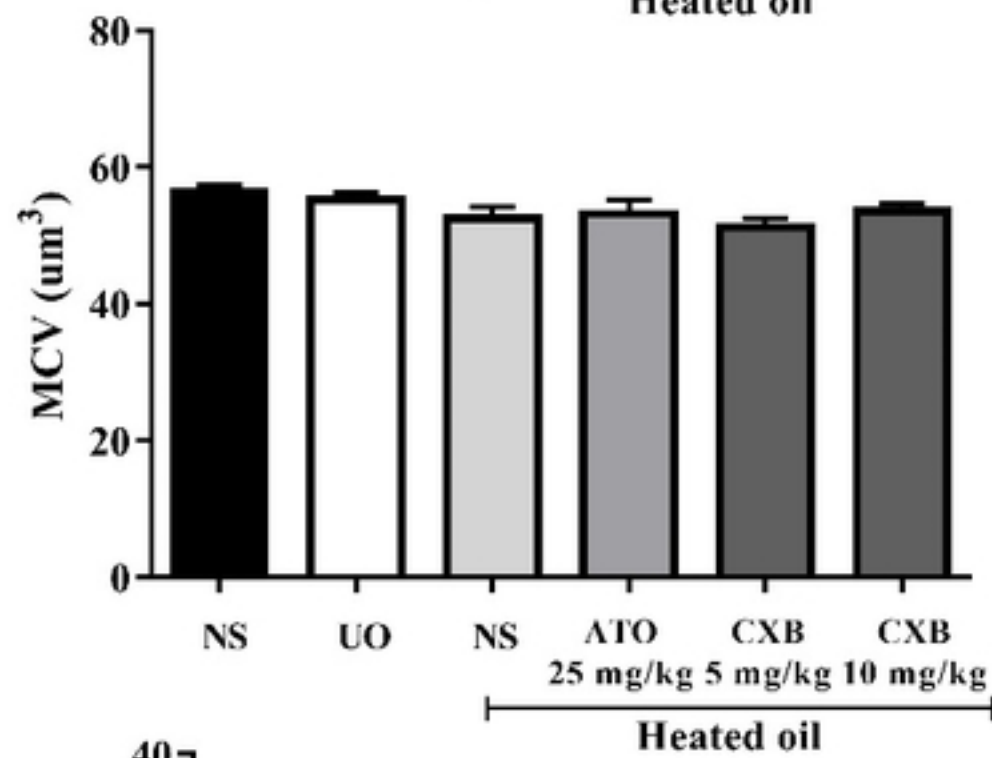**f**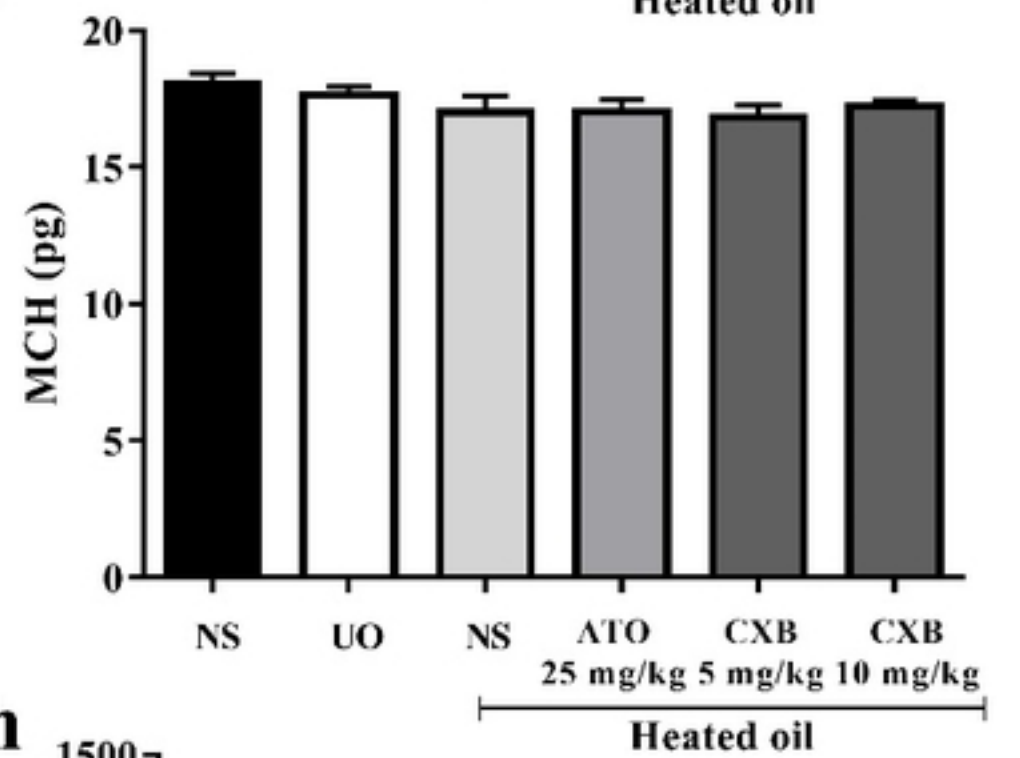**g**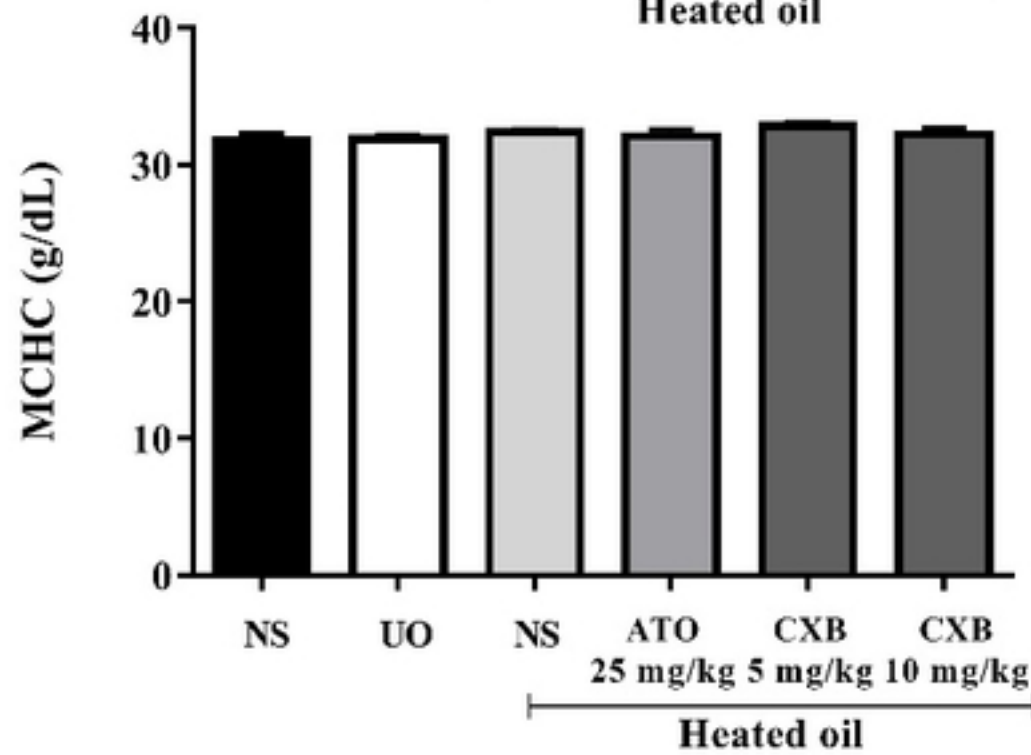**h**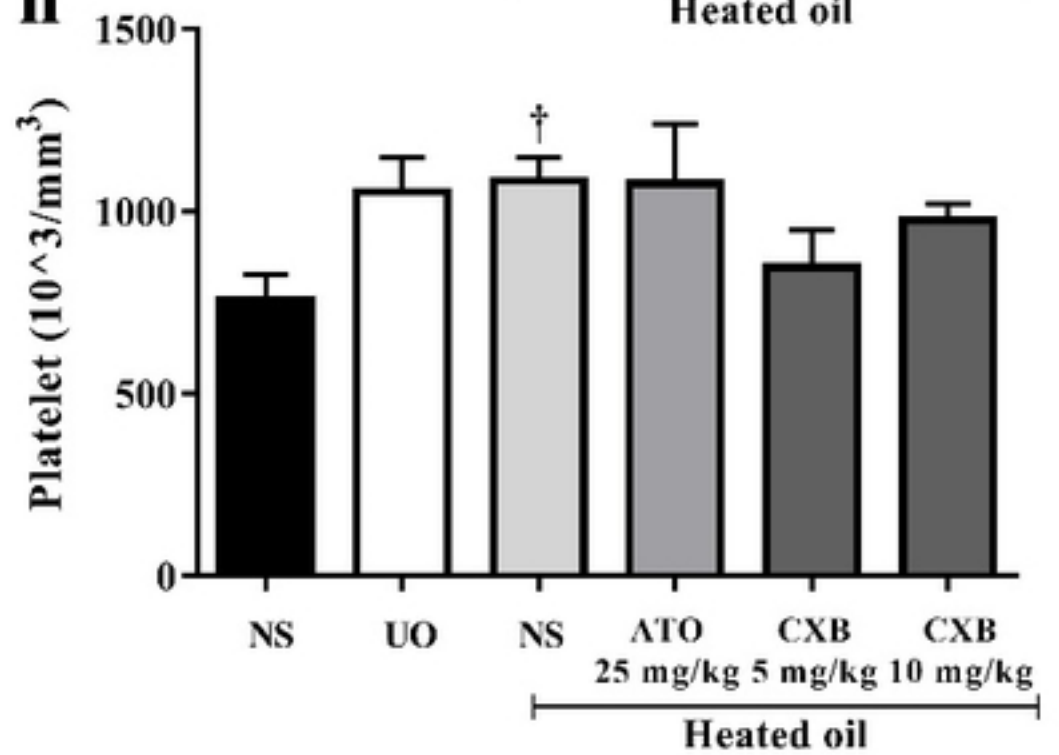

**a**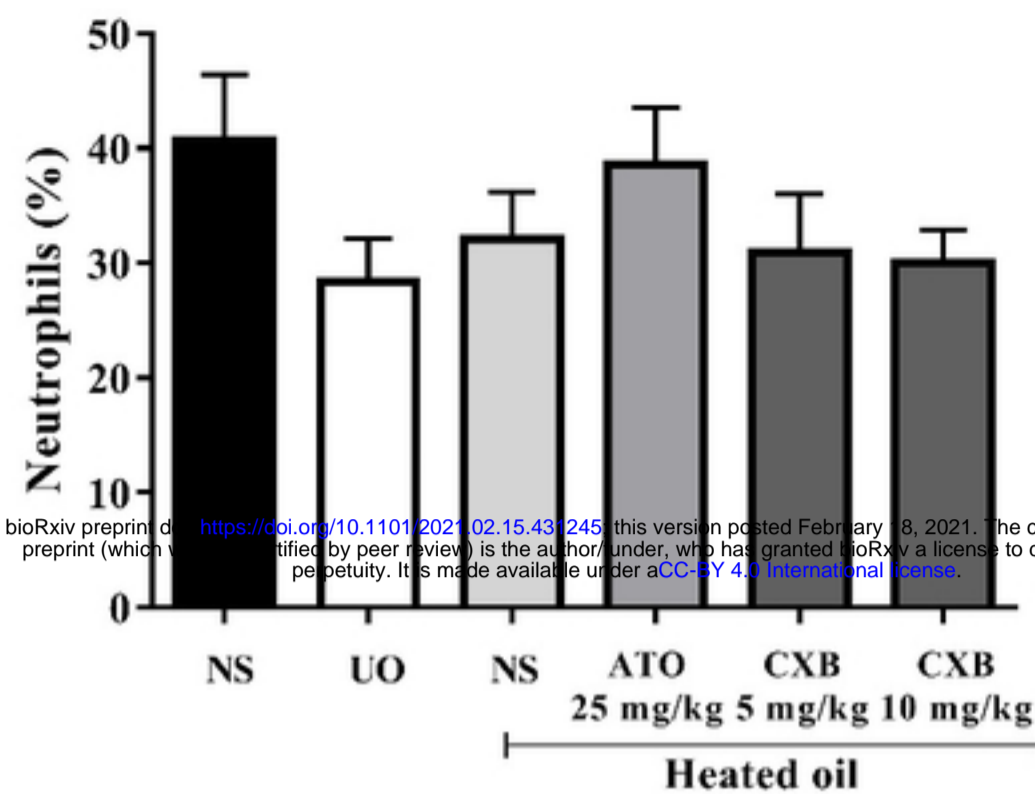**b**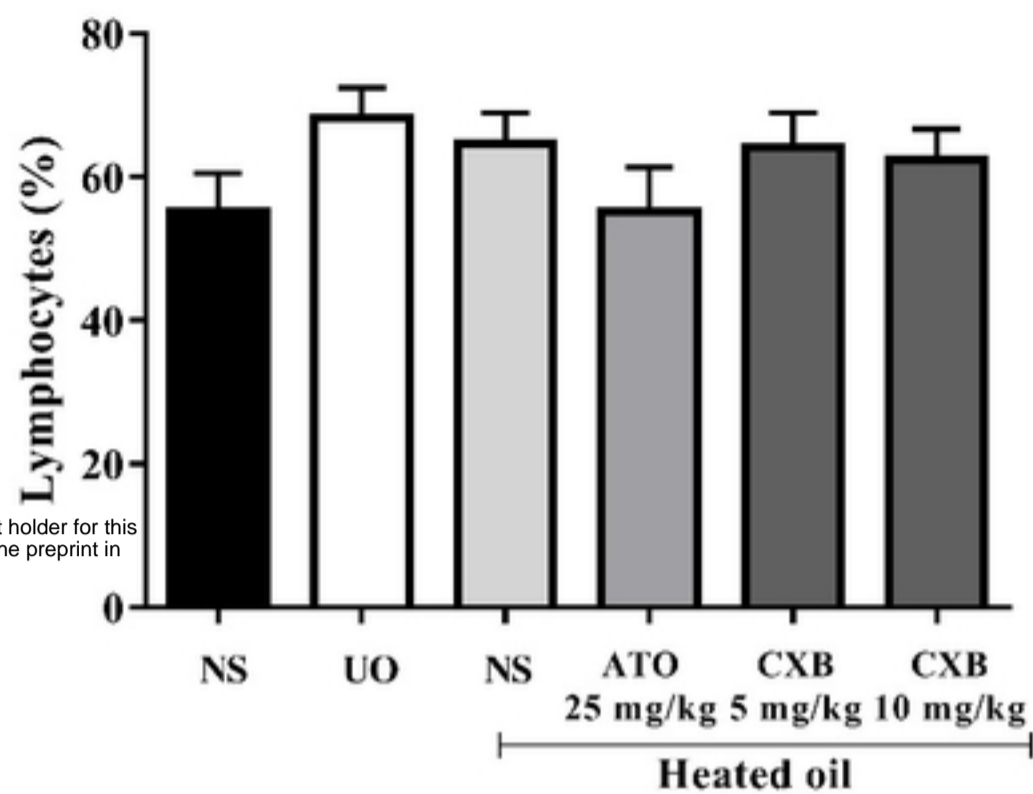**c**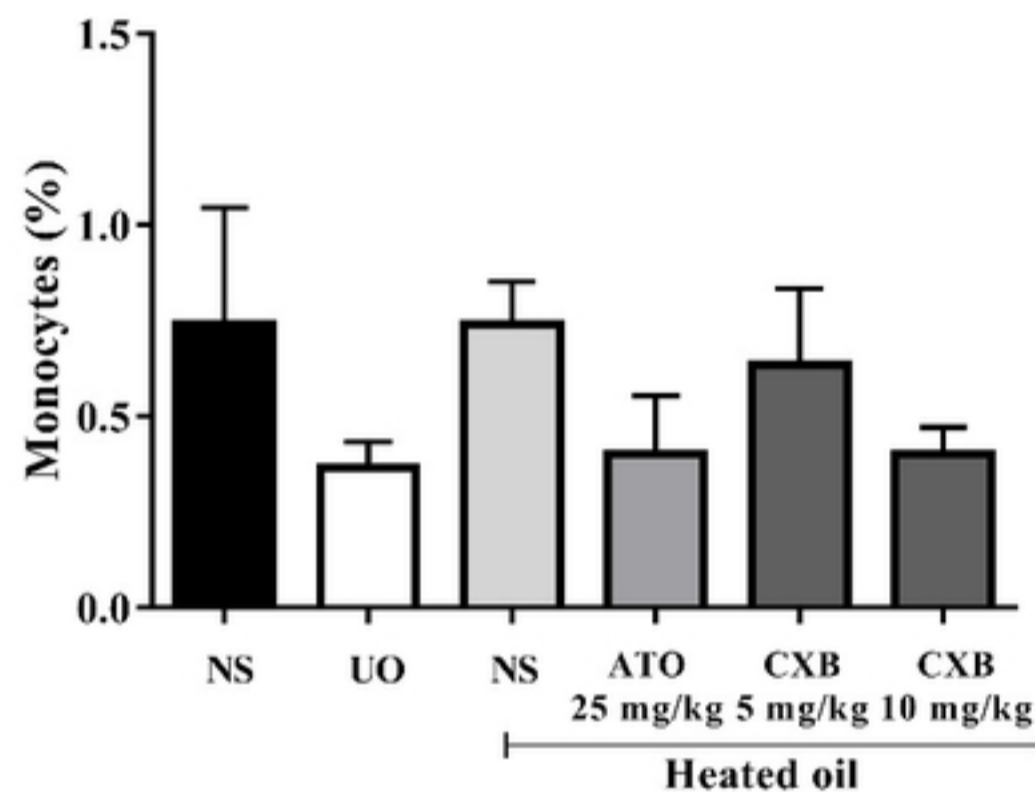**d**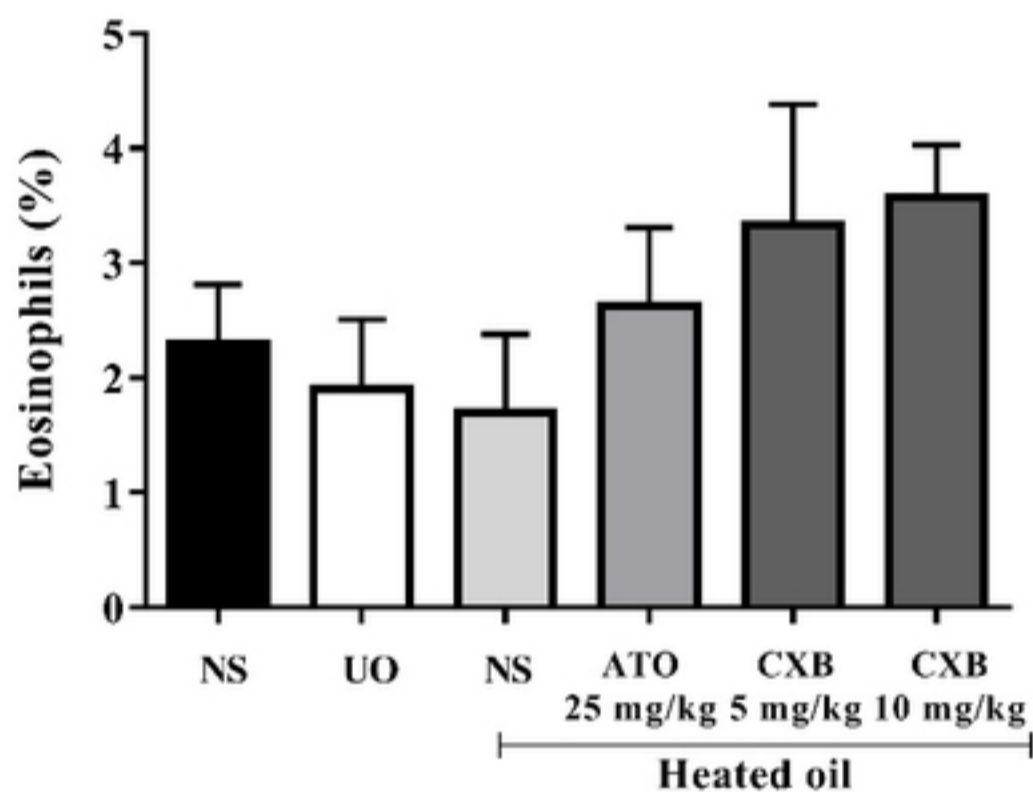**e**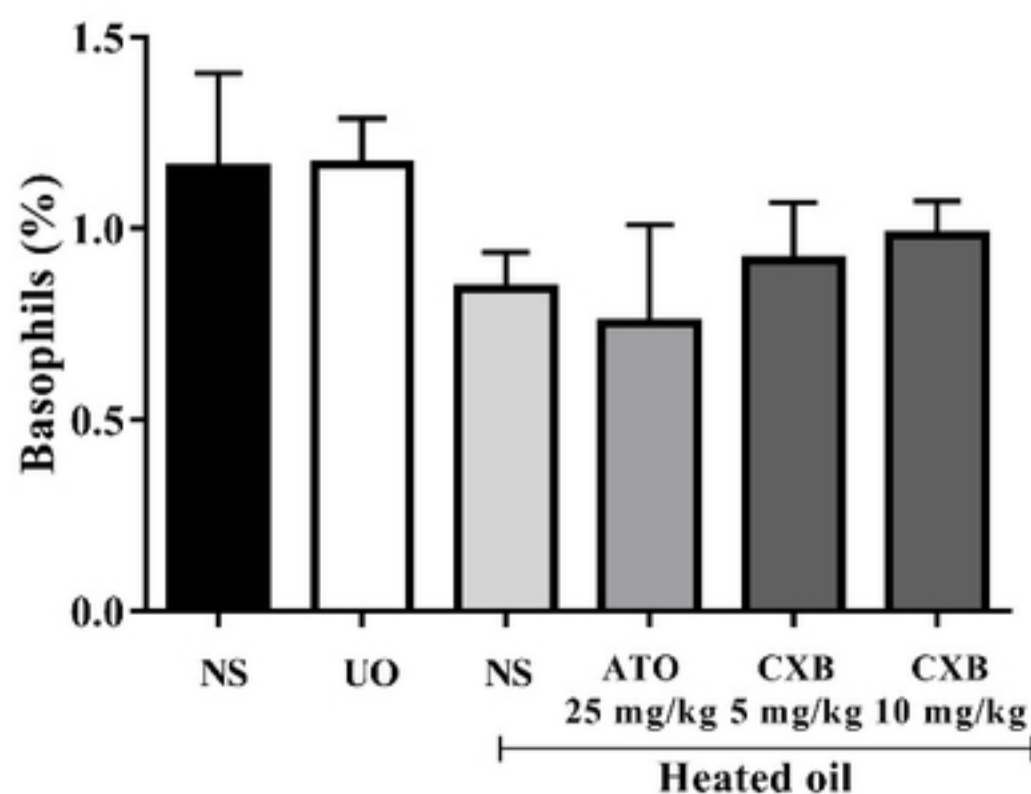



**a**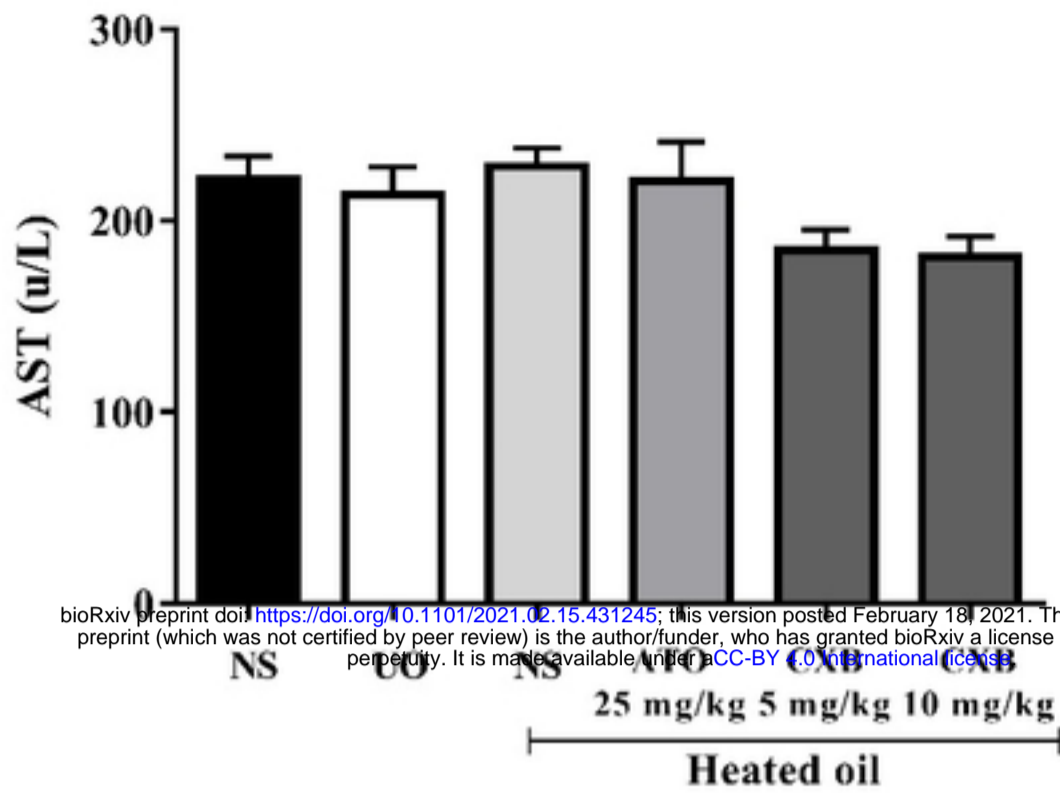**b**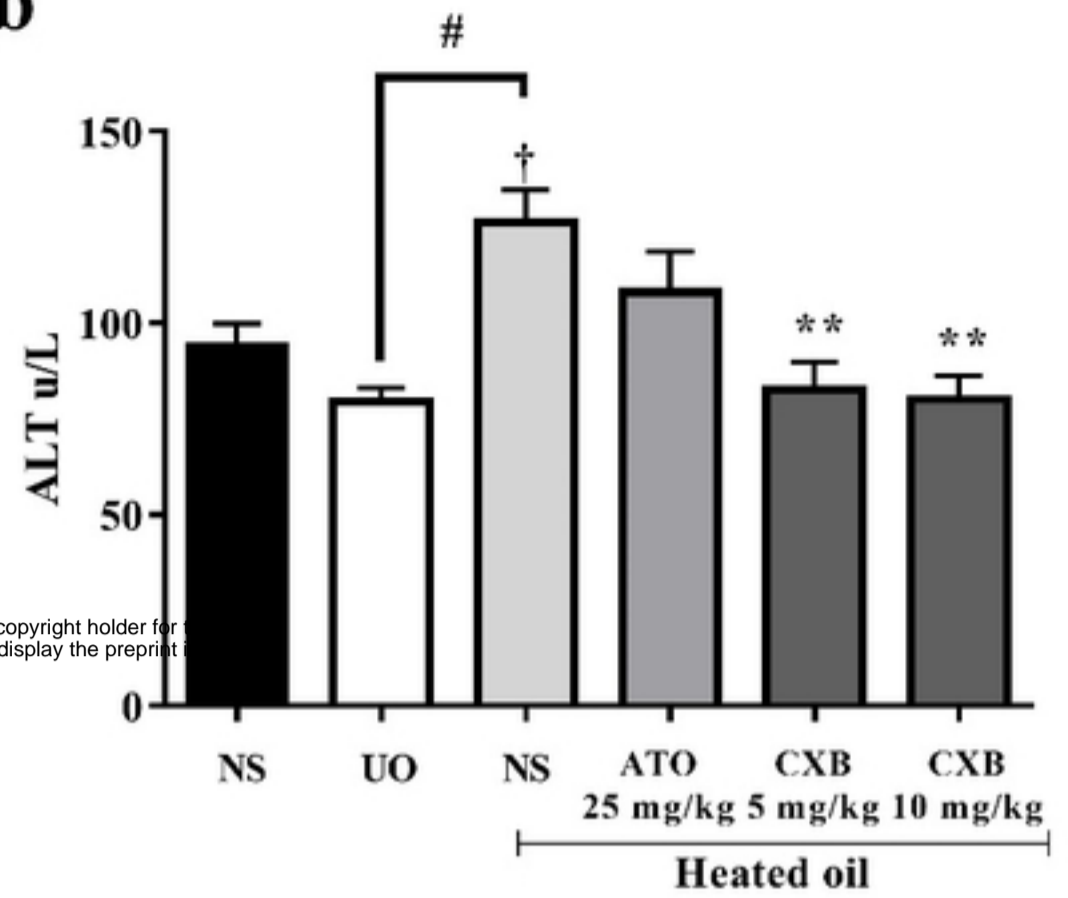**c**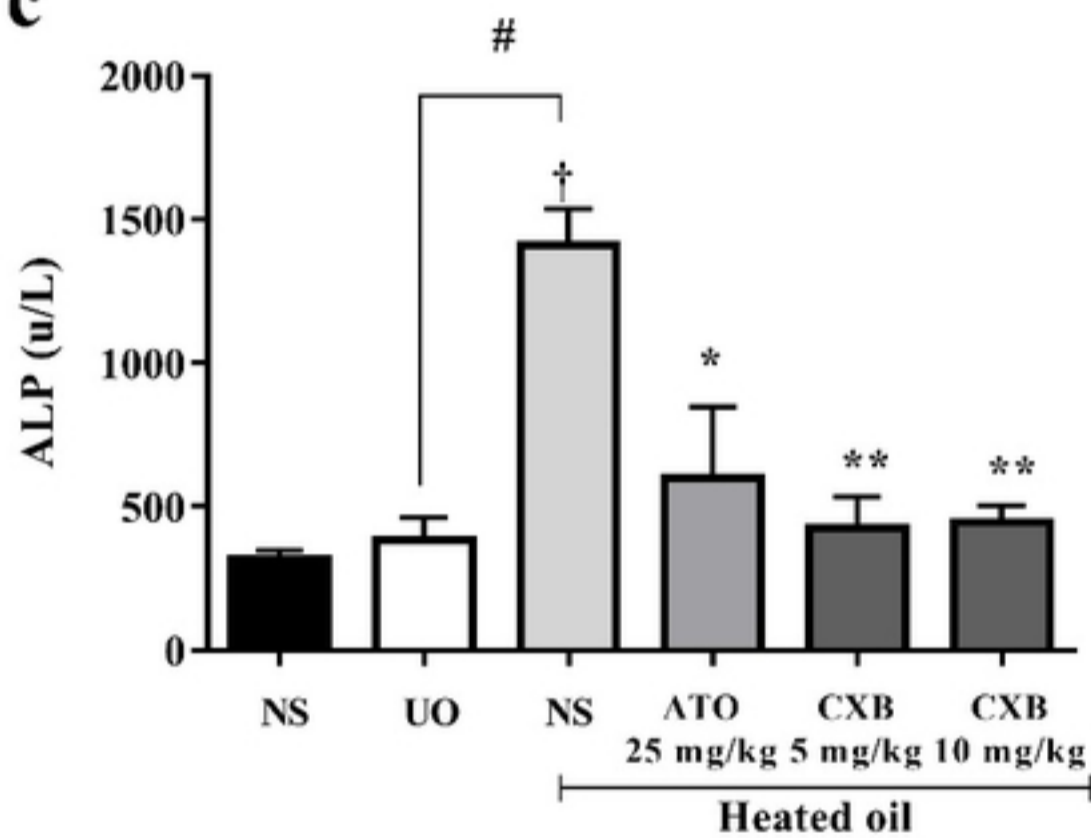**d**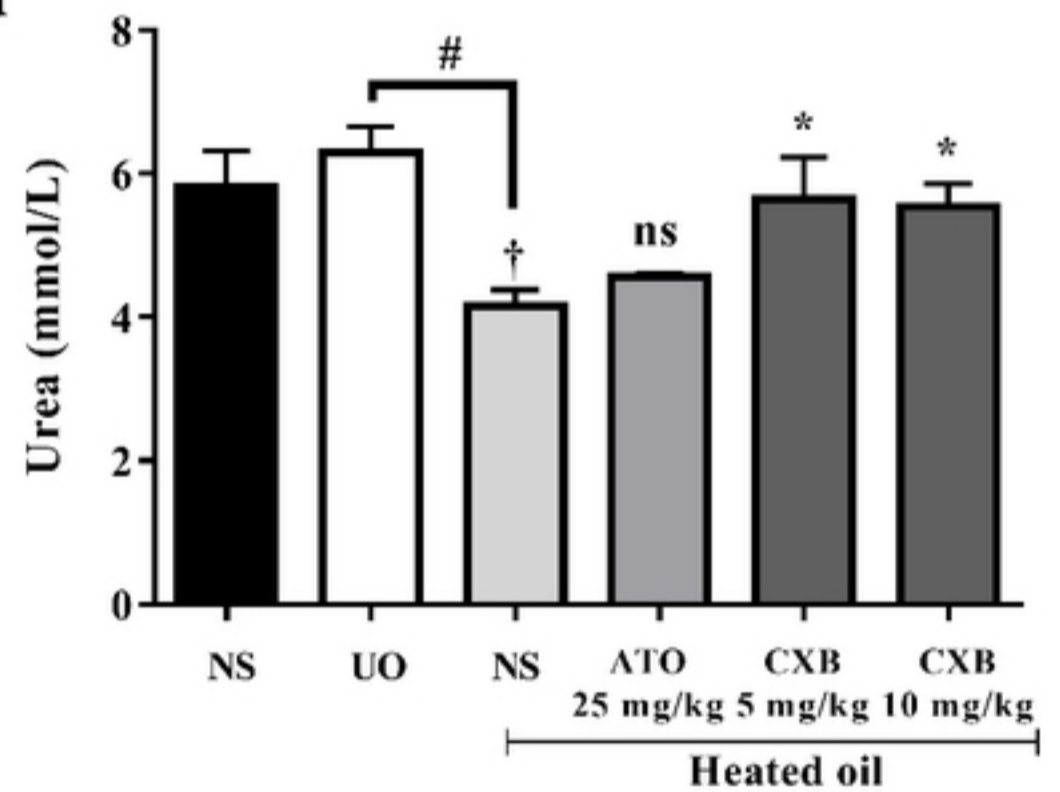**e**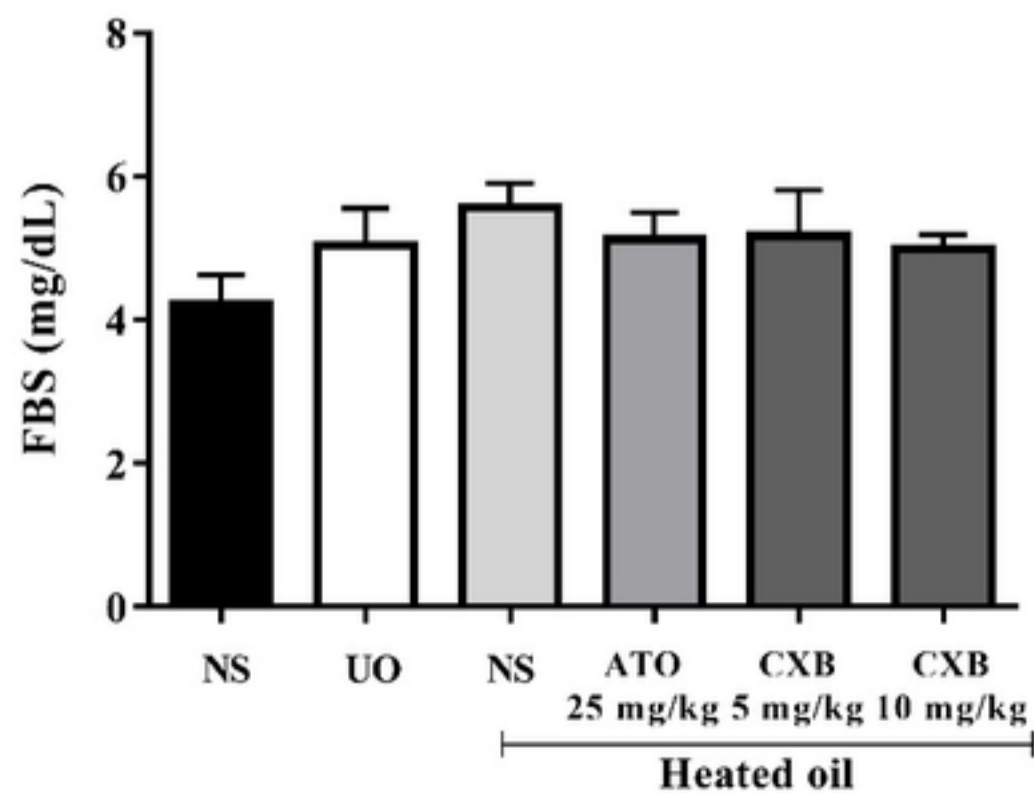

**a**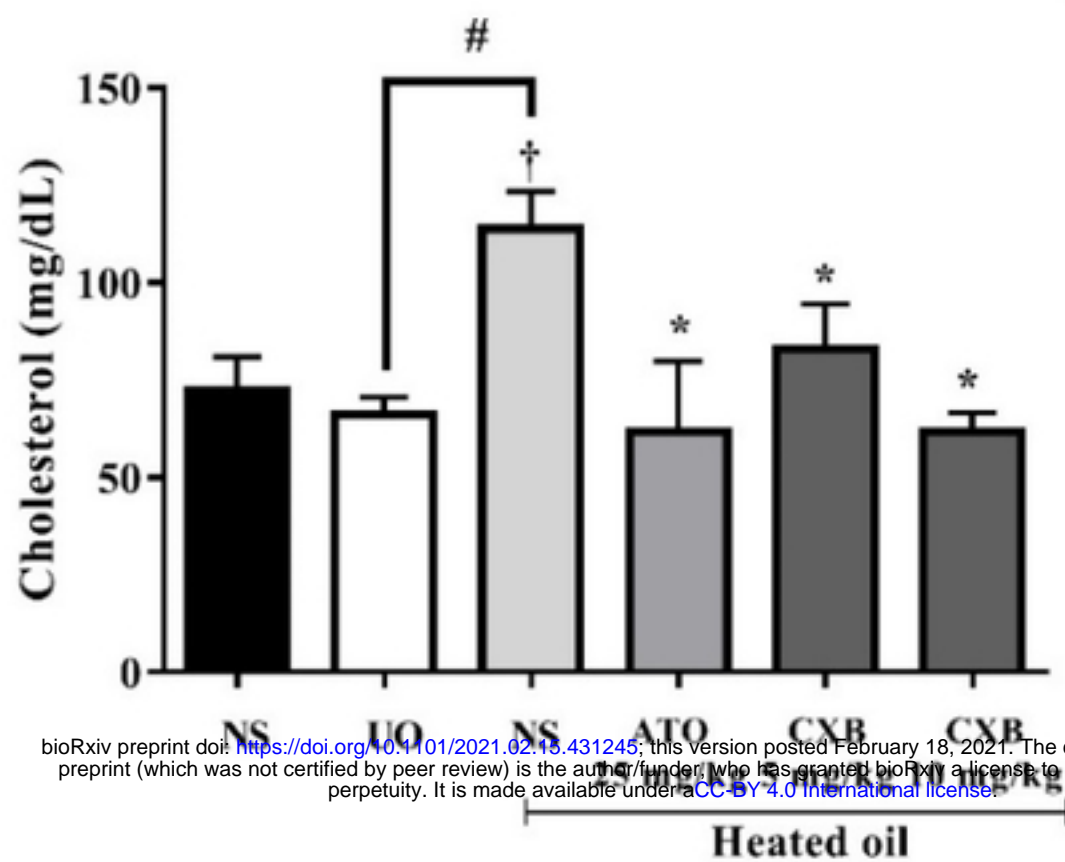**b**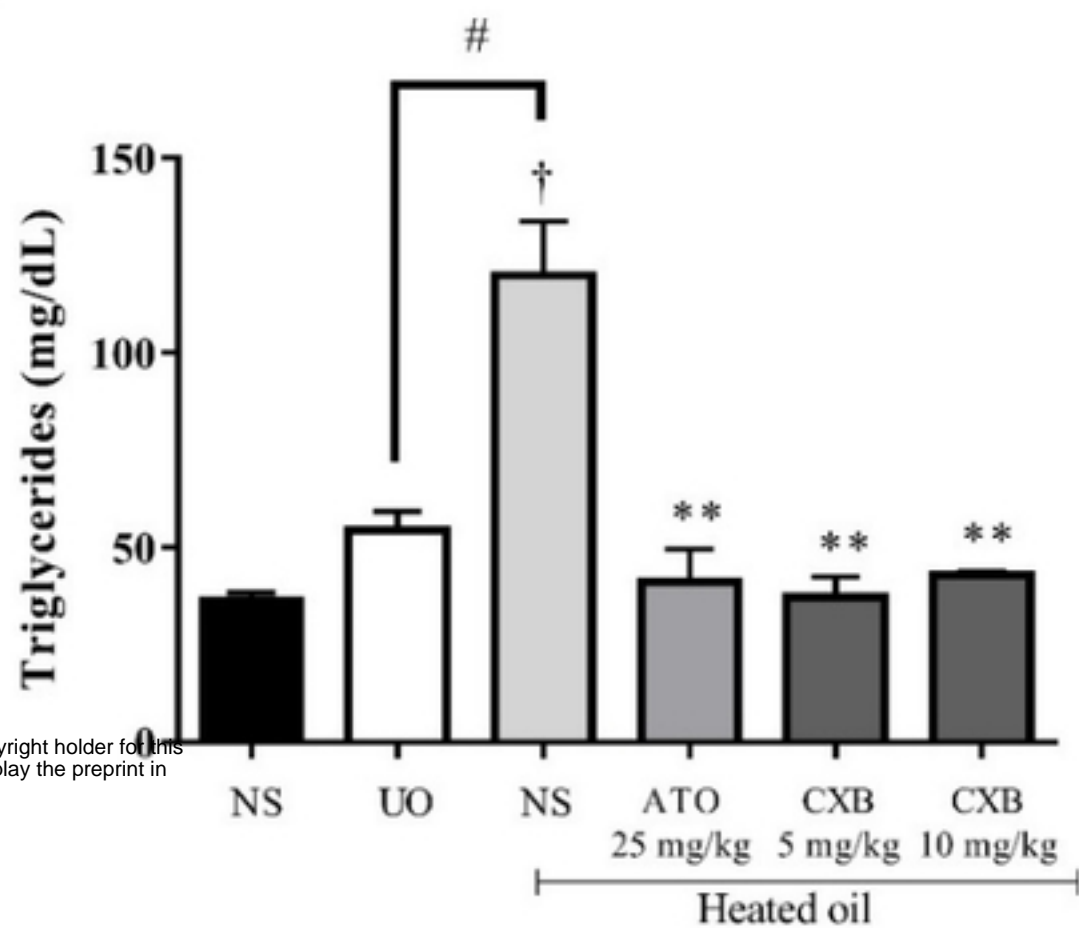**c**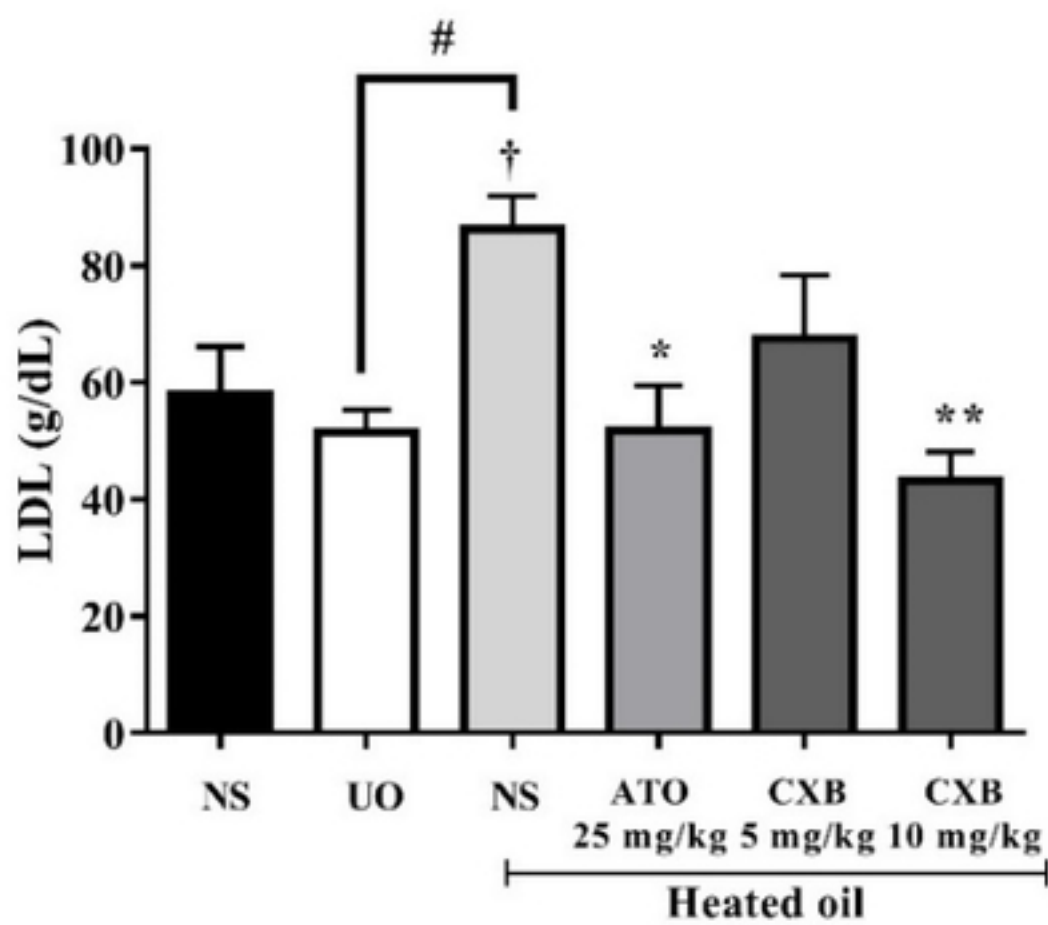**d**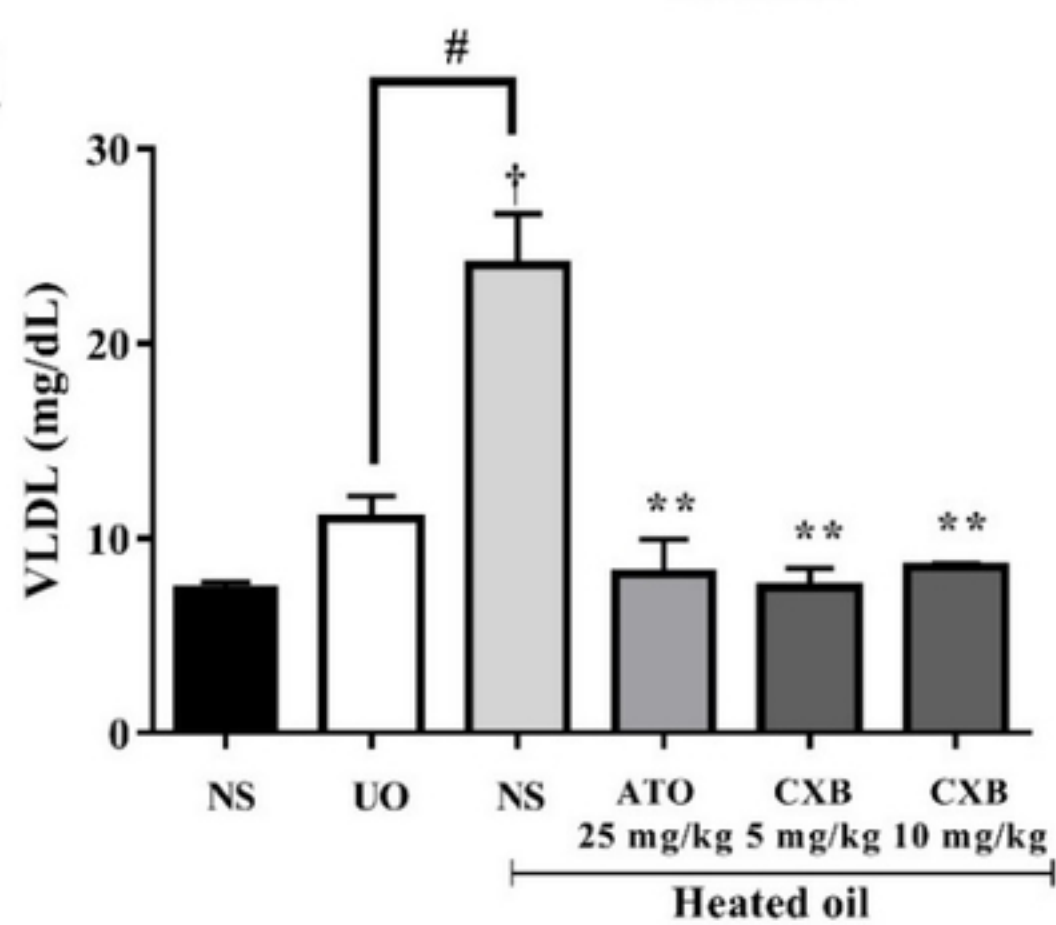**e**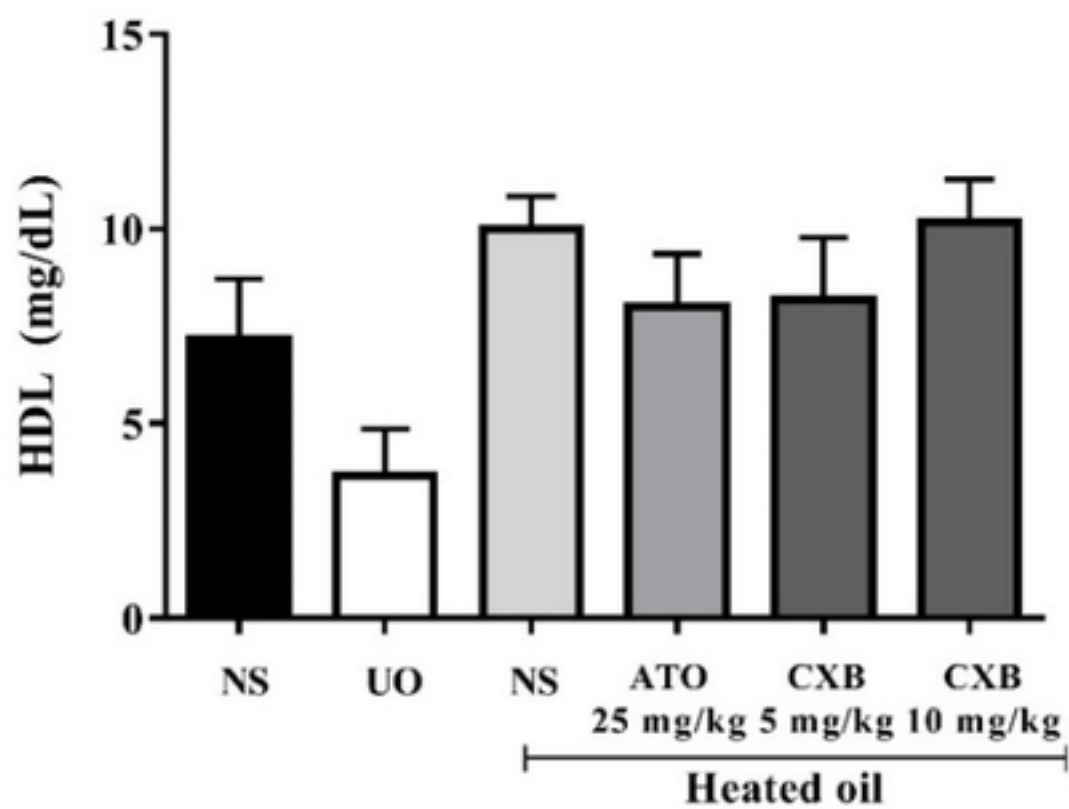

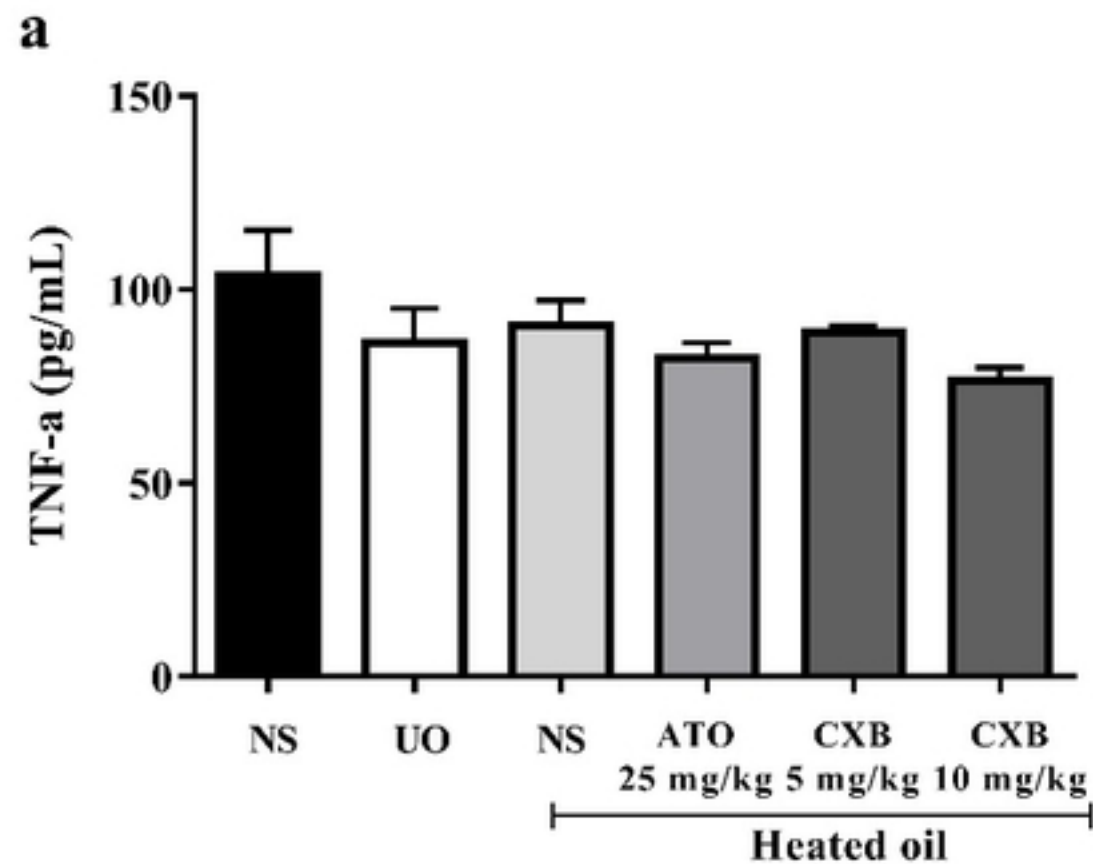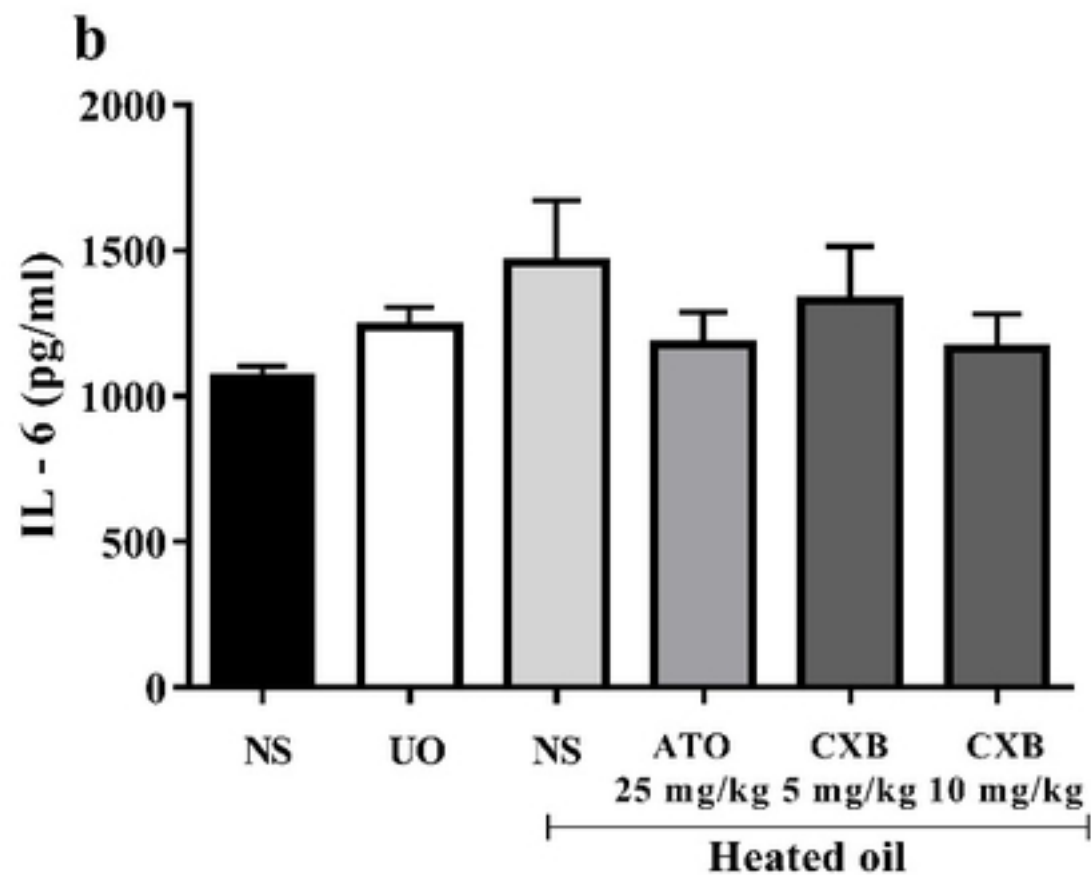

Figure

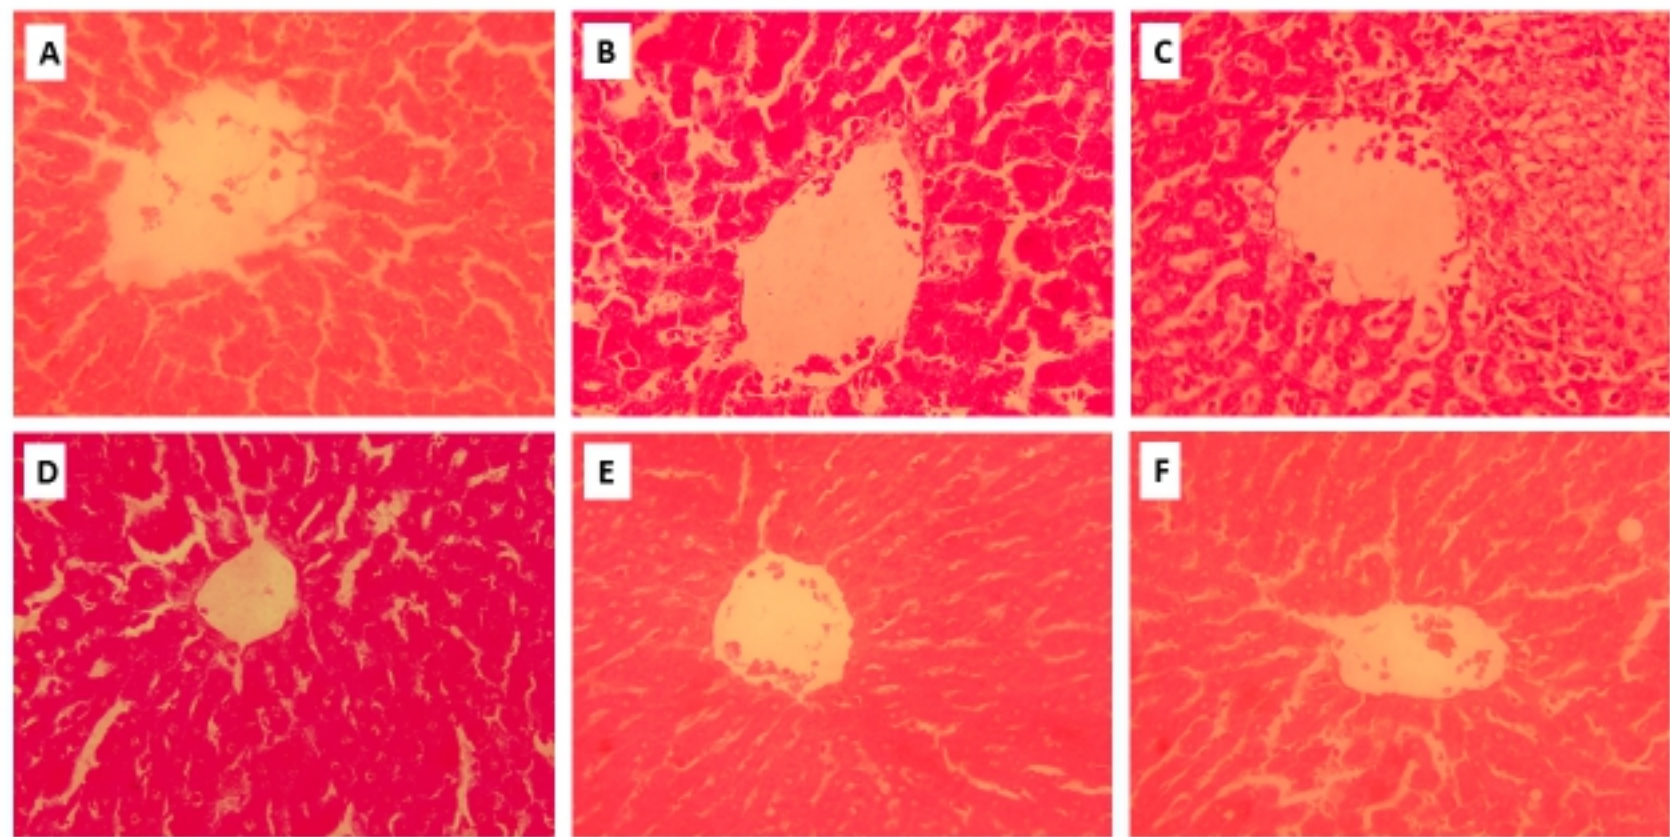

Figure

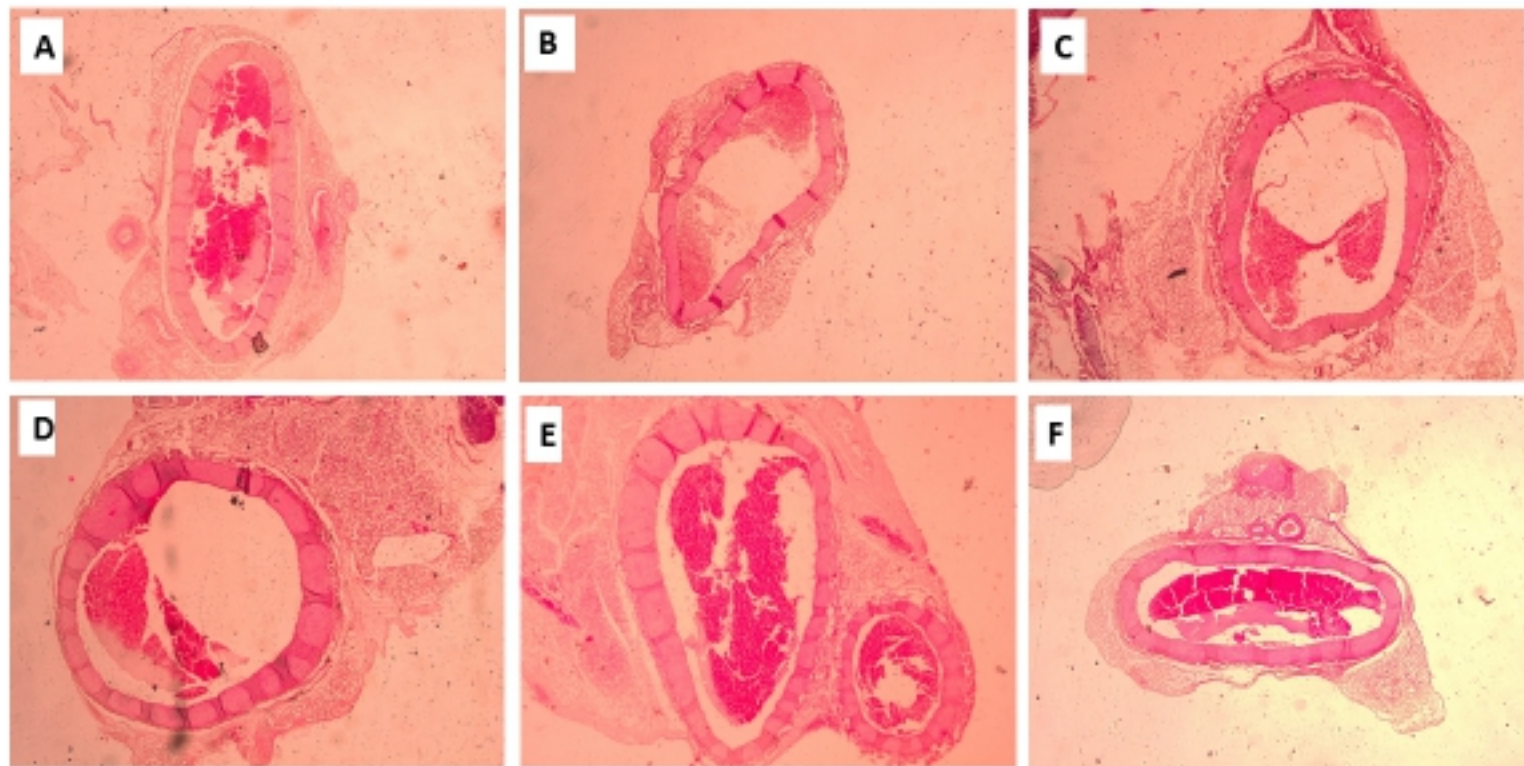

Figure
